# Supplementary material for: Antiobesity and Anti-Inflammatory Effects of Orally Administered Bonito Extracts on Mice Fed a High-Fat Diet
Source: Evid Based Complement Alternat Med. 2017 Oct 24;2017:9187167. doi: 10.1155/2017/9187167 (PMC5674501; doi:10.1155/2017/9187167)
Supplement: Supplementary file 1 — Table 1: Composition and estimated calories of BoE. Table 2: Body weights of six high fat diet feeding mice groups supplemented with or without BoE. Table 3: CT-scan quantitation of A, total; B, visceral and C, subcutaneous fat amount between the fourth and the fifth lumbar vertebra region. Table 4: Quantitation of six biomarkers related with liver and heart functions and obesity. Table 5: Multiplex quantitation of inflammation related cytokine, chemokine and growth factors secreted in sera. [file 9187167.f1.zip]

Archive with 6 entries (6 files):
- 170829 Supplements information.docx
- Suppl Tab.1(BoE)170829.xlsx
- Suppl Tab.2(BoE)170829.xlsx
- Suppl Tab.3(BoE)170829.xlsx
- Suppl Tab.4(BoE)170829.xlsx
- Suppl Tab.5(BoE)170829.xlsx
