# Supplementary material for: Antiobesity and Anti-Inflammatory Effects of Orally Administered Bonito Extracts on Mice Fed a High-Fat Diet
Source: Evid Based Complement Alternat Med. 2017 Oct 24;2017:9187167. doi: 10.1155/2017/9187167 (PMC5674501; doi:10.1155/2017/9187167)
Supplement: Supplementary file 1 — Table 1: Composition and estimated calories of BoE. Table 2: Body weights of six high fat diet feeding mice groups supplemented with or without BoE. Table 3: CT-scan quantitation of A, total; B, visceral and C, subcutaneous fat amount between the fourth and the fifth lumbar vertebra region. Table 4: Quantitation of six biomarkers related with liver and heart functions and obesity. Table 5: Multiplex quantitation of inflammation related cytokine, chemokine and growth factors secreted in sera. [file 9187167.f1.zip › Suppl Tab.1(BoE)170829.xlsx]

## Sheet: Sheet1
Supplemental
	Table.1 Composition and estimated calories of BoE*
	Compounds			g/100g
	Amino acids			63.79		63.79
	Arginine			3.78		17.77
	Lysine			4.77		1.54
	Histidine			8.31		2.8
	Phenylalanine			2.14		14.1
	Tyrosine			1.65		100
	Leucine			4.08
	Isoleucine			2.29
	Methionine			1.57
	Valine			2.79
	Alanine			4.47
	Glycine			5.82
	Prorine			3.19
	Glutamic acid			7.82
	Serine			2.24
	Threonine			2.56
	Aspartic acid			5.21
	Tryptophane			0.59
	Cystine			0.51
	Peptide			17.77
	Anserine			0.63
	undetermined			17.14
	Organic acids			1.54
	Taurine			1.44
	Niacin			0.1
	Fat			2.8
	DHA			0.53
	EPA			0.08
	undetermined			2.19
	Minerals			14.1
	Sodium chrolide			3
	Arsenice(As2O3)			23ppm
	Mercury			30ppb
	undetermined			11.1
	*Quantitated and certified by Pharmatec Co., Ltd.
