# Supplementary material for: Antiobesity and Anti-Inflammatory Effects of Orally Administered Bonito Extracts on Mice Fed a High-Fat Diet
Source: Evid Based Complement Alternat Med. 2017 Oct 24;2017:9187167. doi: 10.1155/2017/9187167 (PMC5674501; doi:10.1155/2017/9187167)
Supplement: Supplementary file 1 — Table 1: Composition and estimated calories of BoE. Table 2: Body weights of six high fat diet feeding mice groups supplemented with or without BoE. Table 3: CT-scan quantitation of A, total; B, visceral and C, subcutaneous fat amount between the fourth and the fifth lumbar vertebra region. Table 4: Quantitation of six biomarkers related with liver and heart functions and obesity. Table 5: Multiplex quantitation of inflammation related cytokine, chemokine and growth factors secreted in sera. [file 9187167.f1.zip › Suppl Tab.2(BoE)170829.xlsx]

## Sheet: Sheet1
Supplemental
	Table 2. Body weights of six high fat diet feeding mice groups supplemented with or without BoE.
A	Body weight (g)															B	Relative body weight vs W0 (%)
		Date of blood sampling		2013.7.31											2013.10.16
		date		2013.7.31	2013.8.7	2013.8.14	2013.8.21	2013.8.28	2013.9.4	2013.9.11	2013.9.18	2013.9.25	2013.10.2	2013.10.9	2013.10.16			Date		2013.7.31	2013.8.7	2013.8.14	2013.8.21	2013.8.28	2013.9.4	2013.9.11	2013.9.18	2013.9.25	2013.10.2	2013.10.9	2013.10.16
	Diet	No.	Sex	w0	w1	w2	w3	w4	w5	w6	w7	w8	w9	w10	w11		Diet	No.	Sex	w0	w1	w2	w3	w4	w5	w6	w7	w8	w9	w10	w11
	HFD	1	M	23.3	22.1	23.5	25.4	24.7	27.1	29.1	30.7	31.9	33.2	34	35.4		HFD	1	M	1	0.948498	1.00858	1.09013	1.06009	1.16309	1.24893	1.3176	1.3691	1.42489	1.45923	1.51931
		2		25.5	28.4	29.5	31.6	31.6	33.8	35.9	37.2	39.1	40.3	40.4	40.2			2		1	1.11373	1.15686	1.23922	1.23922	1.32549	1.40784	1.45882	1.53333	1.58039	1.58431	1.57647
		3		23	23.9	24.1	25.5	26.8	30.4	31.6	34.6	35.9	37.8	38.2	38.3			3		1	1.03913	1.04783	1.1087	1.16522	1.32174	1.37391	1.50435	1.56087	1.64348	1.66087	1.66522
		4		24.5	23.7	25.1	25.5	26	26.3	29.1	29.2	29.4	32.1	33	35			4		1	0.967347	1.02449	1.04082	1.06122	1.07347	1.18776	1.19184	1.2	1.3102	1.34694	1.42857
		5		22	21.9	24.5	24.8	20	26	28.1	29.4	31.3	32.1	32.9	33.2			5		1	0.995455	1.11364	1.12727	0.909091	1.18182	1.27727	1.33636	1.42273	1.45909	1.49545	1.50909
		6		23.5	24.7	25.7	28.2	29	30.8	32	32.6	35	36.5	35	36.6			6		1	1.05106	1.09362	1.2	1.23404	1.31064	1.3617	1.38723	1.48936	1.55319	1.48936	1.55745
		7		23.8	22.9	25.4	25.6	26.8	28.7	30.3	31.3	32.9	34.9	34.1	34			7		1	0.962185	1.06723	1.07563	1.12605	1.20588	1.27311	1.31513	1.38235	1.46639	1.43277	1.42857
		8		23.7	26.5	28	28.7	28.5	31.1	33.4	35.2	37.6	38.3	40.2	40.4			8		1	1.11814	1.18143	1.21097	1.20253	1.31224	1.40928	1.48523	1.5865	1.61603	1.6962	1.70464
		9	F	13.4	20.5	22.5	21.7	21.8	22.7	22.9	23.2	25.4	26.2	27.2	28.5			9	F	1	1.52985	1.6791	1.6194	1.62687	1.69403	1.70896	1.73134	1.89552	1.95522	2.02985	2.12687
		10		19.1	19.3	20.9	21.4	22	22.1	22.7	22.8	24	23.6	23.5	25.8			10		1	1.01047	1.09424	1.12042	1.15183	1.15707	1.18848	1.19372	1.25654	1.2356	1.23037	1.35079
		11		19	18.1	19.3	20.6	21.4	22.1	22.3	22.1	23.1	23.1	23.7	24.5			11		1	0.952632	1.01579	1.08421	1.12632	1.16316	1.17368	1.16316	1.21579	1.21579	1.24737	1.28947
		12		18.1	18.8	19.7	20.3	20.7	21.2	21.8	22.3	22.9	23.2	24.3	25.1			12		1	1.03867	1.0884	1.12155	1.14365	1.17127	1.20442	1.23204	1.26519	1.28177	1.34254	1.38674
		13		19.9	18.8	19.7	21.2	21.8	22.4	22.9	23.3	24.5	23.4	23.1	26.1			13		1	0.944724	0.98995	1.06533	1.09548	1.12563	1.15075	1.17085	1.23116	1.17588	1.1608	1.31156
		14		18.2	18.2	19	20.6	20.4	20.9	22.5	22.3	23.1	22.6	24.1	25.2			14		1	1	1.04396	1.13187	1.12088	1.14835	1.23626	1.22527	1.26923	1.24176	1.32418	1.38462
		15		20.3	20.7	20.9	21.8	22	23.5	24	25.6	28.3	27.6	28.5	30.6			15		1	1.0197	1.02956	1.07389	1.08374	1.15764	1.18227	1.26108	1.39409	1.35961	1.40394	1.50739
		16		17.8	19.2	21.5	21.8	21.3	21.6	22.4	23.1	24	26.6	27.7	29.2			16		1	1.07865	1.20787	1.22472	1.19663	1.21348	1.25843	1.29775	1.34831	1.49438	1.55618	1.64045
	BoE-50	17	M	24	23.5	24.6	26	27.9	30.2	32.1	34	34.8	36.5	37.8	37.8		BoE-50	17	M	1	0.979167	1.025	1.08333	1.1625	1.25833	1.3375	1.41667	1.45	1.52083	1.575	1.575
		18		26.2	24.9	23.7	27.3	29.2	31.6	34.7	36.1	37.7	39.4	39.9	39.9			18		1	0.950382	0.90458	1.04198	1.1145	1.20611	1.32443	1.37786	1.43893	1.50382	1.5229	1.5229
		19		24	23.2	24.2	25.7	26.6	28.8	31.7	32.2	34.3	35.3	36.7	37.1			19		1	0.966667	1.00833	1.07083	1.10833	1.2	1.32083	1.34167	1.42917	1.47083	1.52917	1.54583
		20		25	25.2	25.4	25.7	25.7	27	27.8	28.1	28.7	30.9	29.9	30.6			20		1	1.008	1.016	1.028	1.028	1.08	1.112	1.124	1.148	1.236	1.196	1.224
		21		26	26.7	28.1	29.1	30.2	32.4	34.5	28	34	36.5	37.6	36.9			21		1	1.02692	1.08077	1.11923	1.16154	1.24615	1.32692	1.07692	1.30769	1.40385	1.44615	1.41923
		22		22	22.4	22.8	24	25.5	28.3	31.4	32.9	34.1	36.3	36.6	35.3			22		1	1.01818	1.03636	1.09091	1.15909	1.28636	1.42727	1.49545	1.55	1.65	1.66364	1.60455
		23		24.4	24.8	25.2	27.5	29.3	32.5	34.2	35.4	36.6	37.1	38.7	38.8			23		1	1.01639	1.03279	1.12705	1.20082	1.33197	1.40164	1.45082	1.5	1.52049	1.58607	1.59016
		24		25.8	25.6	26.3	28.1	29.5	31.9	34.3	36.7	37.8	39	40.4	39.9			24		1	0.992248	1.01938	1.08915	1.14341	1.23643	1.32946	1.42248	1.46512	1.51163	1.56589	1.54651
		25	F	19.4	20.1	21.5	23.1	24.1	25.5	26.3	25.9	25.1	28.2	28.7	30.7			25	F	1	1.03608	1.10825	1.19072	1.24227	1.31443	1.35567	1.33505	1.29381	1.45361	1.47938	1.58247
		26		19.5	19.5	20.3	21.6	22.1	22.1	23.2	23.4	23.7	26.6	29	31.7			26		1	1	1.04103	1.10769	1.13333	1.13333	1.18974	1.2	1.21538	1.3641	1.48718	1.62564
		27		19.4	18.4	19.3	20.8	21.1	21.5	22.2	21.7	23	23.3	22.7	23.2			27		1	0.948454	0.994845	1.07216	1.08763	1.10825	1.14433	1.11856	1.18557	1.20103	1.1701	1.19588
		28		19.1	18.2	19.5	20.9	21.9	21.9	22.6	23.2	25	26.1	27.1	30.3			28		1	0.95288	1.02094	1.09424	1.1466	1.1466	1.18325	1.21466	1.3089	1.36649	1.41885	1.58639
		29		19.4	18.3	20	20.6	20.7	20.6	20.7	20.1	21	21.7	22	23.3			29		1	0.943299	1.03093	1.06186	1.06701	1.06186	1.06701	1.03608	1.08247	1.11856	1.13402	1.20103
		30		19.1	19.5	19.3	20.5	20.9	20.4	22.1	22.6	23	25.3	25.2	26.9			30		1	1.02094	1.01047	1.0733	1.09424	1.06806	1.15707	1.18325	1.20419	1.32461	1.31937	1.40838
		31		20	20.4	20.7	21.4	22.1	23	23.8	23.1	29.8	25.1	25.5	25			31		1	1.02	1.035	1.07	1.105	1.15	1.19	1.155	1.49	1.255	1.275	1.25
		32		18.6	19.2	19.5	19.8	20.5	20.6	21.1	21.2	22	22.5	23.8	24.8			32		1	1.03226	1.04839	1.06452	1.10215	1.10753	1.13441	1.13978	1.1828	1.20968	1.27957	1.33333
	BoE-500	33	M	23.8	23.2	24.4	25.1	24.7	28.6	29.8	31.4	32.7	33.7	33.5	33.2		BoE-500	33	M	1	0.97479	1.02521	1.05462	1.03782	1.20168	1.2521	1.31933	1.37395	1.41597	1.40756	1.39496
		34		24.9	24.8	24.7	25.6	26.7	27.8	28.8	31.3	32.3	34.6	37.2	36.7			34		1	0.995984	0.991968	1.02811	1.07229	1.11647	1.15663	1.25703	1.29719	1.38956	1.49398	1.4739
		35		26.3	27.5	26	27.8	29.2	30.2	33.1	35.3	35.7	34	31.7	37.2			35		1	1.04563	0.988593	1.05703	1.11027	1.14829	1.25856	1.34221	1.35741	1.29278	1.20532	1.41445
		36		22	22.2	22.5	23	25.2	27.9	31.9	33.9	34	35.8	37.2	38			36		1	1.00909	1.02273	1.04545	1.14545	1.26818	1.45	1.54091	1.54545	1.62727	1.69091	1.72727
		37		23.8	25.2	23.6	27.1	27.4	30.5	32.3	32.2	33.5	34.8	36.7	34.9			37		1	1.05882	0.991597	1.13866	1.15126	1.28151	1.35714	1.35294	1.40756	1.46218	1.54202	1.46639
		38		24.1	24	25.1	26	27	29	31.1	33.2	34.7	35.3	35	35.1			38		1	0.995851	1.04149	1.07884	1.12033	1.20332	1.29046	1.37759	1.43983	1.46473	1.45228	1.45643
		39		24.5	23.6	23.4	23.2	24.2	24.7	25.2	27.2	28.3	29	30.7	31.6			39		1	0.963265	0.955102	0.946939	0.987755	1.00816	1.02857	1.1102	1.1551	1.18367	1.25306	1.2898
		40		23.5	19.6	22.5	23.3	24.6	26.7	28.8	31	31.8	32.9	34.3	34.4			40		1	0.834043	0.957447	0.991489	1.04681	1.13617	1.22553	1.31915	1.35319	1.4	1.45957	1.46383
		41	F	18.9	19	19.7	21	22	21.6	21.9	22.7	22.7	22.7	24.8	24.9			41	F	1	1.00529	1.04233	1.11111	1.16402	1.14286	1.15873	1.20106	1.20106	1.20106	1.31217	1.31746
		42		20.4	19.6	21.7	22.8	23.5	23.2	23.7	23	23.4	25.1	26.2	26			42		1	0.960784	1.06373	1.11765	1.15196	1.13725	1.16176	1.12745	1.14706	1.23039	1.28431	1.27451
		43		19.6	20	21.8	22.3	22.2	22.5	22.5	22.6	23.3	24.4	25	24.9			43		1	1.02041	1.11224	1.13776	1.13265	1.14796	1.14796	1.15306	1.18878	1.2449	1.27551	1.27041
		44		19.1	18.8	19.5	19.6	19.9	20	20.4	20.6	21.4	22.6	23.3	22.9			44		1	0.984293	1.02094	1.02618	1.04188	1.04712	1.06806	1.07853	1.12042	1.18325	1.2199	1.19895
		45		20.9	20.5	21.3	23.2	22.9	23.1	24	24.3	24.4	26.1	26.2	26.6			45		1	0.980861	1.01914	1.11005	1.09569	1.10526	1.14833	1.16268	1.16746	1.2488	1.25359	1.27273
		46		21.1	20.5	21.2	22.3	23	25.2	27.6	26.7	26.3	26.3	28	29.8			46		1	0.971564	1.00474	1.05687	1.09005	1.19431	1.30806	1.2654	1.24645	1.24645	1.32701	1.41232
		47		21.2	21.8	22.5	23.3	24.6	25.5	26.2	25.7	27.3	29.8	32.5	34.5			47		1	1.0283	1.06132	1.09906	1.16038	1.20283	1.23585	1.21226	1.28774	1.40566	1.53302	1.62736
		48		19.9	19.3	20.9	21.6	22.1	23.2	23.4	23.5	25.4	26.1	26.8	29.9			48		1	0.969849	1.05025	1.08543	1.11055	1.16583	1.17588	1.1809	1.27638	1.31156	1.34673	1.50251
C
	Average body weight
	Sex	Group		w0	w1	w2	w3	w4	w5	w6	w7	w8	w9	w10	w11
	M	HFD		23.6625	24.2625	25.725	26.9125	26.675	29.275	31.1875	32.525	34.1375	35.65	35.975	36.6375
		BoE-50		24.675	24.5375	25.0375	26.675	27.9875	30.3375	32.5875	32.925	34.75	36.375	37.2	37.0375
		BoE-500		24.1125	23.7625	24.025	25.1375	26.125	28.175	30.125	31.9375	32.875	33.7625	34.5375	35.1375
	F	HFD		18.225	19.2	20.4375	21.175	21.425	22.0625	22.6875	23.0875	24.4125	24.5375	25.2625	26.875
		BoE-50		19.3125	19.2	20.0125	21.0875	21.675	21.95	22.75	22.65	24.075	24.85	25.5	26.9875
		BoE-500		20.1375	19.9375	21.075	22.0125	22.525	23.0375	23.7125	23.6375	24.275	25.3875	26.6	27.4375
D
	Relative body weight ratio (w0:1)
	Sex	Group		w0	w1	w2	w3	w4	w5	w6	w7	w8	w9	w10	w11
	M	HFD		1	1.02536	1.08716	1.13735	1.12731	1.23719	1.31801	1.37454	1.44268	1.5066	1.52034	1.54834
		BoE-50		1	0.994428	1.01469	1.08105	1.13425	1.22948	1.32067	1.33435	1.40831	1.47416	1.5076	1.50101
		BoE-500		1	0.985485	0.996371	1.04251	1.08346	1.16848	1.24935	1.32452	1.3634	1.40021	1.43235	1.45723
	F	HFD		1	1.0535	1.1214	1.16187	1.17558	1.21056	1.24486	1.2668	1.33951	1.34636	1.38615	1.47462
		BoE-50		1	0.994175	1.03625	1.09191	1.12233	1.13657	1.17799	1.17282	1.2466	1.28673	1.32039	1.39741
		BoE-500		1	0.990068	1.04655	1.09311	1.11856	1.14401	1.17753	1.17381	1.20546	1.26071	1.32092	1.36251
E
	Relative body weight ratio (w0:100%)
	Sex	Group		w0	w1	w2	w3	w4	w5	w6	w7	w8	w9	w10	w11
	M	HFD		1	1.02444	1.08671	1.13659	1.12468	1.2368	1.31748	1.37457	1.44303	1.50671	1.52064	1.54867
		BoE-50		1	0.994745	1.0154	1.08131	1.13477	1.23067	1.32251	1.33823	1.41111	1.47718	1.5106	1.50352
		BoE-500		1	0.984684	0.996767	1.04264	1.084	1.17047	1.25237	1.32742	1.36621	1.40452	1.43809	1.46088
	F	HFD		1	1.07184	1.14361	1.18017	1.19317	1.22883	1.26291	1.2844	1.35948	1.37	1.4119	1.49973
		BoE-50		1	0.994239	1.03623	1.09181	1.12228	1.13626	1.17768	1.1728	1.24539	1.28663	1.32043	1.39789
		BoE-500		1	0.990169	1.04684	1.09301	1.1184	1.14293	1.17558	1.17267	1.20442	1.25901	1.31903	1.35953
F
	Standard deviation
	Sex	Group		w0	w1	w2	w3	w4	w5	w6	w7	w8	w9	w10	w11
	M	HFD		0	0.0669963	0.0615671	0.0717113	0.111779	0.0943491	0.0818072	0.105545	0.127276	0.111771	0.118212	0.100026
		BoE-50		0	0.0273456	0.0499346	0.0341967	0.0521313	0.074303	0.0939985	0.154182	0.126854	0.119002	0.141392	0.126532
		BoE-500		0	0.0689807	0.0313552	0.0571641	0.0576034	0.0885274	0.126207	0.12026	0.112692	0.129948	0.154851	0.123615
	F	HFD		0	0.190088	0.226545	0.184369	0.178677	0.189593	0.183494	0.186139	0.224693	0.256856	0.277315	0.277998
		BoE-50		0	0.0396557	0.0337995	0.0429088	0.0545842	0.0791445	0.0825193	0.0861623	0.121213	0.109676	0.133008	0.180153
		BoE-500		0	0.0249023	0.0338381	0.0360428	0.0421027	0.0498689	0.0704303	0.0566082	0.0607741	0.0703525	0.0955279	0.144036
G
	Relative body weight ratio: BoE/HFD (%)
	Sex	Group		w0	w1	w2	w3	w4	w5	w6	w7	w8	w9	w10	w11
	M	BoE-50		1	0.97101	0.934382	0.951363	1.00897	0.995047	1.00382	0.973566	0.977882	0.980403	0.993397	0.970851
		BoE-500		1	0.96119	0.917234	0.917342	0.963826	0.946375	0.950585	0.965698	0.946766	0.932178	0.945711	0.943314
	F	BoE-50		1	0.927602	0.906107	0.925128	0.940583	0.924667	0.932519	0.913107	0.916079	0.939148	0.935216	0.932092
		BoE-500		1	0.923804	0.915381	0.926145	0.937331	0.930096	0.930852	0.913007	0.88594	0.918983	0.934221	0.906515
H
	Body weight fluctuation: (%)
	Sex	Group		w0	w1	w2	w3	w4	w5	w6	w7	w8	w9	w10	w11
	M	BoE-50		0	-0.0289896	-0.0656183	-0.0486369	0.00897344	-0.00495282	0.00381869	-0.0264343	-0.0221179	-0.0195974	-0.00660303	-0.0291491
		BoE-500		0	-0.0388105	-0.0827658	-0.0826578	-0.0361744	-0.0536246	-0.0494146	-0.0343019	-0.0532338	-0.0678224	-0.0542892	-0.0566863
	F	BoE-50		0	-0.0723981	-0.0938929	-0.0748719	-0.0594173	-0.0753328	-0.0674807	-0.0868931	-0.0839213	-0.0608516	-0.0647843	-0.0679084
		BoE-500		0	-0.0761955	-0.0846192	-0.0738546	-0.0626689	-0.0699038	-0.0691484	-0.086993	-0.11406	-0.081017	-0.0657786	-0.0934853
I
	p-Value
	Group		BoE	w0	w1	w2	w3	w4	w5	w6	w7	w8	w9	w10	w11
	BoE vs control Male		50	ND	P=0.2778	P=0.0282	P=0.0765	P=0.8195	P=0.8898	P=0.9138	P=0.5997	P=0.6366	P=0.6312	P=0.8850	P=0.4551
			500	ND	P=0.2811	P=0.0042	P=0.0147	P=0.3807	P=0.1841	P=0.2505	P=0.4324	P=0.2392	P=0.1246	P=0.2633	P=0.1503
	BoE vs control Female		50	ND	P=0.2940	P=0.2259	P=0.2286	P=0.3138	P=0.2346	P=0.2622	P=0.1583	P=0.2505	P=0.4200	P=0.4198	P=0.4203
			500	ND	P=0.2662	P=0.2704	P=0.2308	P=0.2873	P=0.2553	P=0.2416	P=0.1426	P=0.0961	P=0.2716	P=0.3973	P=0.2495
