# Supplementary material for: Antiobesity and Anti-Inflammatory Effects of Orally Administered Bonito Extracts on Mice Fed a High-Fat Diet
Source: Evid Based Complement Alternat Med. 2017 Oct 24;2017:9187167. doi: 10.1155/2017/9187167 (PMC5674501; doi:10.1155/2017/9187167)
Supplement: Supplementary file 1 — Table 1: Composition and estimated calories of BoE. Table 2: Body weights of six high fat diet feeding mice groups supplemented with or without BoE. Table 3: CT-scan quantitation of A, total; B, visceral and C, subcutaneous fat amount between the fourth and the fifth lumbar vertebra region. Table 4: Quantitation of six biomarkers related with liver and heart functions and obesity. Table 5: Multiplex quantitation of inflammation related cytokine, chemokine and growth factors secreted in sera. [file 9187167.f1.zip › Suppl Tab.3(BoE)170829.xlsx]

## Sheet: CAT Wk0 vs Wk4
Supplemental Table 3. CT-scan quantitation of A, total; B, visceral and C, subcutaneous fat amount between the fourth and the fifth lumbar vertebra region
A					Week 0 (Body Fat)				Week 4 (Body Fat)				Change (Wk0 to Wk4)				Avrg Change (Wk0 to Wk4)				StDev (Wk0 to Wk4)				vs HFD				Stat signifcance Wk0				Stat signifcance Wk4
	Diet	No.	Sex		Volume（mm3）	Vol ratio（%）	Area（mm2）	Area ratio（%）	Volume（mm3）	Vol ratio（%）	Area（mm2）	Area ratio（%）	Volume（mm3）	Vol ratio（%）	Area（mm2）	Area ratio（%）	Volume（mm3）	Vol ratio（%）	Area（mm2）	Area ratio（%）	Volume（mm3）	Vol ratio（%）	Area（mm2）	Area ratio（%）	Volume（mm3）	Vol ratio（%）	Area（mm2）	Area ratio（%）	T-test (Control vs BoE)				T-test (Control vs BoE)
	HFD	1	M	Body Fat	256.584	19.417	84.592	21.398	180.534	11.198	43.631	10.82	70.3606	57.6711	51.5782	50.5655													Male				Male
		3			258.931	18.769	51.191	13.455	384.404	21.677	90.532	20.562	148.458	115.494	176.851	152.821													HDF vs BoE-50		P=0.8009		HDF vs BoE-50		P=0.7792
		4			195.223	15.001	54.791	13.873	183.5	11.227	31.481	7.74	93.9951	74.8417	57.4565	55.7918													HDF vs BoE-500		P=0.2083		HDF vs BoE-500		P=0.7876
		5			196.173	14.901	48.941	12.219	142.304	9.989	36.051	10.135	72.5401	67.0358	73.6622	82.9446													Female				Female
		6			211.988	13.618	40.001	9.941	493.82	24.509	110.572	21.903	232.947	179.975	276.423	220.33													HDF vs BoE-50		P=0.5603		HDF vs BoE-50		P=0.9862
		8			413.401	26.496	85.782	20.367	443.387	22.441	109.142	21.992	107.253	84.6958	127.232	107.979	120.926	96.6188	127.201	111.738	61.8337	45.4159	87.3864	65.108	100	100	100	100	HDF vs BoE-500		P=0.1832		HDF vs BoE-500		P=0.6049
		9	F		174.909	13.641	44.391	12.013	128.431	8.542	32.541	8.865	73.4273	62.62	73.3054	0																	Stat signifcance Wk4
		11			227.453	16.925	53.761	15.26	113.708	8.095	29.031	8.249	49.9919	47.8287	54.0001	#VALUE!
		12			207.256	18.634	60.551	16.955	111.761	7.835	26.311	7.41	53.9241	42.0468	43.4526	0																	T-test (W0 vs W4)
		14			217.755	16.826	59.931	16.237	126.241	8.471	36.601	9.797	57.9739	50.3447	61.0719	0																	M HDF W0 vs W4			P=0.7372
		15			196.593	16.111	59.421	15.862	134.891	9.085	31.211	8.354	68.6143	56.39	52.5252	0																	M BoE-50 W0 vs W4			P=0.8468
		16			238.656	19.854	62.731	17.371	95.406	6.961	25.381	7.42	39.9764	35.0609	40.4601	0	57.318	49.0485	54.1359	#VALUE!	12.2758	9.85828	11.9946	#VALUE!	100	100	100	#VALUE!					M BoE-500 W0 vs W4			P=0.0380
	BoE-50	17	M		232.827	17.022	51.201	12.822	352.633	19.269	82.222	17.942	151.457	113.201	160.587	0																	F HDF W0 vs W4			P=7.445E-05
		20			184.653	13.137	34.451	8.743	96.744	6.567	21.26	5.629	52.3923	49.9886	61.7108	809.987																	F BoE-50 W0 vs W4			P=7.415E-04
		21			271.673	17.04	65.201	15.196	516.583	25.83	126.533	25.377	190.149	151.585	194.066	0																	F BoE-500 W0 vs W4			P=1.672E-04
		22			253.609	17.409	55.831	14.766	247.901	15.191	71.241	17.398	97.7493	87.2595	127.601	0																	Stat signif. Wk0 to Wk4
		23			354.773	21.909	67.061	15.704	422.609	21.563	92.282	18.903	119.121	98.4207	137.609	120.371
		24			258.738	17.941	49.861	12.052	372.347	19.572	93.332	19.706	143.909	109.091	187.184	163.508	125.796	101.591	144.793	182.311	47.6385	33.3725	48.4234	315.556	104.028	105.146	113.831	163.159					Control(W0toW4) vs BoE(W0toW4)
		25	F		229.066	15.983	56.301	14.201	134.125	8.499	29.851	7.564	58.553	53.1752	53.0204	53.2639																	Male
		26			247.007	20.818	90.762	23.013	189.55	11.768	37.511	9.424	76.7387	56.528	41.329	40.9508																	HDF vs BoE-50		P=0.8427
		27			201.004	15.204	50.181	13.763	91.818	6.598	26.411	7.497	45.6797	43.3965	52.6315	54.4721																	HDF vs BoE-500		P=0.2818
		28			217.038	17.249	56.711	14.911	130.925	9.138	33.061	9.215	60.3235	52.977	58.2973	61.8																	Female
		31			183.474	15.802	47.631	13.372	106.529	7.125	28.541	7.706	58.0622	45.0892	59.9211	57.6279																	HDF vs BoE-50		P=0.7331
		32			140.329	11.173	39.781	10.861	85.673	5.96	22.26	6.156	61.0515	53.3429	55.9564	56.6799	60.0681	50.7515	53.5259	54.1324	9.92258	5.23581	6.62408	7.10106	104.798	103.472	98.8733	#VALUE!					HDF vs BoE-500		P=0.5844
	BoE-500	33	M		239.344	16.739	53.261	13.272	221.571	13.66	53.801	13.336	92.5743	81.6058	101.014	100.482
		35			271.315	17.682	70.911	17.116	261.421	13.877	54.501	11.597	96.3533	78.4809	76.8583	67.7553
		36			308.521	22.977	77.632	20.969	274.327	16.552	64.041	15.61	88.9168	72.0373	82.493	74.4432
		37			404.14	28.178	130.933	31.751	369.481	20.737	100.532	22.685	91.424	73.5929	76.7813	71.4466
		38			338.693	23.474	69.811	18.167	360.762	19.636	83.982	18.335	106.516	83.65	120.299	100.925
		40			297.142	21.152	76.582	18.581	169.694	10.992	37.741	9.878	57.1087	51.9667	49.2818	53.1618	88.8155	73.5556	84.4546	78.0357	16.7116	11.4835	24.152	19.0183	73.4463	76.1297	66.3948	69.8378
		41	F		200.376	16.664	51.561	15.171	113.075	7.495	25.481	6.757	56.4314	44.9772	49.4191	44.5389
		42			172.54	13.216	37.001	10.447	108.267	7.094	24.92	6.562	62.7489	53.6774	67.3495	62.8123
		43			133.547	11.543	41.331	11.617	82.313	5.8	21.05	5.806	61.636	50.2469	50.9303	49.9785
		45			200.191	14.64	45.631	12.033	142.76	9.243	30.581	7.92	71.3119	63.1352	67.018	65.819
		46			178.929	15.922	47.481	13.277	118.91	7.246	27.831	6.887	66.4565	45.5094	58.615	51.8717
		48			250.308	18.21	57.441	15.623	154.587	9.883	31.181	8.058	61.7587	54.2724	54.2835	51.5778	63.3906	51.9697	57.9359	54.433	5.03449	6.73033	7.82964	8.15232	110.595	105.956	107.019	#VALUE!
B					Week 0 (Visceral Fat)				Week 4 (Visceral Fat)				Change (Wk0 to Wk4)				Avrg Change (Wk0 to Wk4)				StDev (Wk0 to Wk4)				vs HFD				Stat signifcance Wk0				Stat signifcance Wk4
	Diet	No.	Sex		Volume（mm3）	Vol ratio（%）	Area（mm2）	Area ratio（%）	Volume（mm3）	Vol ratio（%）	Area（mm2）	Area ratio（%）	Volume（mm3）	Vol ratio（%）	Area（mm2）	Area ratio（%）	Volume（mm3）	Vol ratio（%）	Area（mm2）	Area ratio（%）	Volume（mm3）	Vol ratio（%）	Area（mm2）	Area ratio（%）	Volume（mm3）	Vol ratio（%）	Area（mm2）	Area ratio（%）	T-test (Control vs BoE)				T-test (Control vs BoE)
	HFD	1	M	Visceral Fat	70.096	5.305	29.631	7.495	71.841	4.456	17.17	4.258	102.489	83.9962	57.9461	56.8112													Male				Male
		3			122.978	8.914	21.98	5.777	215.2	12.135	60.721	13.791	174.991	136.134	276.256	238.723													HDF vs BoE-50		P=0.9537		HDF vs BoE-50		P=0.7654
		4			79.211	6.087	21.95	5.558	82.004	5.017	12.34	3.034	103.526	82.4216	56.2187	54.588													HDF vs BoE-500		P=0.1663		HDF vs BoE-500		P=0.7817
		5			90.28	6.857	22.98	5.737	53.534	3.758	12.7	3.57	59.2977	54.8053	55.2654	62.2276													Female				Female
		6			110.171	7.077	16.2	4.026	358.735	17.804	83.622	16.565	325.617	251.576	516.185	411.451													HDF vs BoE-50		P=0.4829		HDF vs BoE-50		P=0.7339
		8			219.749	14.084	49.081	11.653	266.745	13.501	76.502	15.415	121.386	95.8606	155.869	132.284	147.884	117.466	186.29	159.347	94.7645	70.8172	183.526	142.485	100	100	100	100	HDF vs BoE-500		P=0.1007		HDF vs BoE-500		P=0.7406
		9	F		75.209	5.866	20.27	5.486	55.219	3.673	16.1	4.3	73.4207	62.6151	79.4277	78.3813																	Stat signifcance Wk4
		11			81.308	6.05	25.381	7.204	35.944	2.559	12.01	3.413	44.2072	42.2975	47.3189	47.3765
		12			87.268	7.846	30.311	8.487	34.451	2.415	8.21	2.312	39.4772	30.78	27.0859	27.2417																	T-test (W0 vs W4)
		14			75.931	5.867	21.74	5.89	39.171	2.628	11.73	3.14	51.5876	44.7929	53.9558	53.3107																	M HDF W0 vs W4			P=0.6273
		15			76.823	6.296	28.281	7.549	51.205	3.449	13.18	3.528	66.6532	54.7808	46.6037	46.7347																	M BoE-50 W0 vs W4			P=0.3095
		16			104.401	8.685	31.431	8.703	25.674	1.873	9.15	2.675	24.5917	21.5659	29.1114	30.7365	49.9896	42.8054	47.2506	47.2969	17.9903	15.0716	19.0599	18.3259	100	100	100	100					M BoE-500 W0 vs W4			P=0.2403
	BoE-50	17	M		91.403	6.683	21.06	5.274	199.218	10.886	34.781	7.59	217.956	162.891	165.152	143.914																	F HDF W0 vs W4			P=5.812E-05
		20			68.792	4.894	10.38	2.634	24.931	1.692	5.74	1.52	36.2411	34.5729	55.2987	57.7069																	F BoE-50 W0 vs W4			P=0.0291
		21			121.534	7.623	33.471	7.801	340.274	17.015	96.252	19.304	279.983	223.206	287.568	247.455																	F BoE-500 W0 vs W4			P=5.272E-04
		22			113.168	7.768	27.681	7.321	137.927	8.452	38.551	9.414	121.878	108.805	139.269	128.589																	Stat signif. Wk0 to Wk4
		23			191.704	11.839	37.411	8.761	264.945	13.518	65.401	13.397	138.205	114.182	174.818	152.916
		24			128.408	8.904	20.55	4.967	214.773	11.289	67.801	14.316	167.258	126.786	329.932	288.222	160.253	128.407	192.006	169.801	83.7276	62.562	100.64	83.9912	108.364	109.315	103.068	106.56					Control(W0toW4) vs BoE(W0toW4)
		25	F		93.156	6.5	26.671	6.727	61.602	3.904	11.79	2.987	66.1278	60.0615	44.2053	44.4032																	Male
		26			92.908	7.83	37.011	9.384	112.962	7.013	19.9	5	121.585	89.5658	53.7678	53.2822																	HDF vs BoE-50		P=0.7933
		27			56.564	4.278	19	5.211	22.002	1.581	7.1	2.015	38.8975	36.9565	37.3684	38.6682																	HDF vs BoE-500		P=0.2767
		28			103.903	8.258	28.261	7.43	49.199	3.434	15.7	4.376	47.3509	41.5839	55.5536	58.8964																	Female
		31			65.396	5.632	20.42	5.733	21.408	1.432	9.98	2.695	32.7359	25.4261	48.8737	47.0085																	HDF vs BoE-50		P=0.7158
		32			53.375	4.25	17.2	4.696	18.262	1.271	5.91	1.634	34.2145	29.9059	34.3605	34.7956	56.8186	47.25	45.6882	46.1757	34.0089	23.958	8.6312	8.96686	113.661	110.383	96.6935	97.6294					HDF vs BoE-500		P=0.7840
	BoE-500	33	M		108.065	7.558	26.611	6.631	106.784	6.583	32.851	8.143	98.8146	87.0998	123.449	122.802
		35			126.514	8.245	35.001	8.448	138.396	7.347	33.121	7.048	109.392	89.1086	94.6287	83.428
		36			159.916	11.91	47.681	12.879	144.389	8.712	40.281	9.818	90.2905	73.1486	84.4802	76.2326
		37			206.438	14.393	68.551	16.623	225.936	12.681	75.852	17.116	109.445	88.1053	110.65	102.966
		38			162.823	11.285	37.111	9.657	209.839	11.421	59.771	13.049	128.876	101.205	161.06	135.125
		40			149.713	10.657	42.701	10.36	77.509	5.021	18.99	4.97	51.7717	47.1146	44.472	47.973	98.0982	80.9637	103.123	94.7544	26.1196	18.8231	39.2075	32.074	66.3344	68.9254	55.3564	59.4641
		41	F		71.628	5.957	18.83	5.541	34.603	2.293	8.1	2.148	48.3093	38.4925	43.0165	38.7656
		42			63.945	4.898	14.17	4.001	28.866	1.891	7.14	1.88	45.1419	38.6076	50.3881	46.9883
		43			50.715	4.384	17.24	4.846	15.133	1.066	4.72	1.302	29.8393	24.3157	27.3782	26.8675
		45			73.758	5.394	20.58	5.427	57.594	3.729	10.94	2.833	78.0851	69.1324	53.1584	52.202
		46			64.674	5.755	19.79	5.534	47.347	2.885	10.3	2.549	73.2087	50.1303	52.0465	46.0607
		48			97.328	7.081	26.591	7.232	57.364	3.667	11.89	3.073	58.9388	51.7865	44.7144	42.4917	55.5872	45.4108	45.117	42.2293	18.182	15.2629	9.5886	8.77305	111.197	106.087	95.4846	89.2855
C					Week 0 (Subcutaneous Fat)				Week 4 (Subcutaneous Fat)				Change (Wk0 to Wk4)				Avrg Change (Wk0 to Wk4)				StDev (Wk0 to Wk4)				vs HFD				Stat signifcance Wk0				Stat signifcance Wk4
	Diet	No.	Sex		Volume（mm3）	Vol ratio（%）	Area（mm2）	Area ratio（%）	Volume（mm3）	Vol ratio（%）	Area（mm2）	Area ratio（%）	Volume（mm3）	Vol ratio（%）	Area（mm2）	Area ratio（%）	Volume（mm3）	Vol ratio（%）	Area（mm2）	Area ratio（%）	Volume（mm3）	Vol ratio（%）	Area（mm2）	Area ratio（%）	Volume（mm3）	Vol ratio（%）	Area（mm2）	Area ratio（%）	T-test (Control vs BoE)				T-test (Control vs BoE)
	HFD	1	M	Subcutaneous Fat	186.488	14.113	54.961	13.903	108.693	6.742	26.461	6.562	58.2842	47.7716	48.145	47.1984													Male				Male
		3			135.953	9.855	29.211	7.678	169.203	9.541	29.811	6.771	124.457	96.8138	102.054	88.187													HDF vs BoE-50		P=0.6797		HDF vs BoE-50		P=0.8877
		4			116.011	8.914	32.841	8.315	101.495	6.21	19.14	4.706	87.4874	69.6657	58.2808	56.5965													HDF vs BoE-500		P=0.4864		HDF vs BoE-500		P=0.8835
		5			105.893	8.043	25.961	6.481	88.771	6.231	23.35	6.565	83.8308	77.4711	89.9426	101.296													Female				Female
		6			101.817	6.54	23.8	5.915	135.085	6.704	26.951	5.339	132.674	102.508	113.239	90.262													HDF vs BoE-50		P=0.7597		HDF vs BoE-50		P=0.2442
		8			193.653	12.412	36.701	8.714	176.642	8.94	32.641	6.577	91.2157	72.0271	88.9376	75.4762	96.3249	77.7095	83.4333	76.5027	27.6409	19.8658	25.2417	20.96	100	100	100	100	HDF vs BoE-500		P=0.3808		HDF vs BoE-500		P=0.5418
		9	F		99.7	7.776	24.12	6.528	73.212	4.87	16.44	4.479	73.4323	62.6286	68.1592	68.6121																	Stat signifcance Wk4
		11			146.144	10.875	28.381	8.056	77.764	5.536	17.02	4.836	53.2105	50.9057	59.9697	60.0298
		12			119.989	10.788	30.241	8.468	77.31	5.42	18.1	5.098	64.4309	50.241	59.8525	60.2031																	T-test (W0 vs W4)
		14			141.823	10.959	38.191	10.347	87.07	5.842	24.87	6.657	61.3934	53.3078	65.1201	64.3375																	M HDF W0 vs W4			P=0.0935
		15			119.77	9.815	31.141	8.313	83.687	5.636	18.03	4.826	69.8731	57.4223	57.8979	58.0537																	M BoE-50 W0 vs W4			P=0.0187
		16			134.255	11.169	31.301	8.667	69.732	5.088	16.23	4.745	51.94	45.5547	51.8514	54.7479	62.38	53.3434	60.4751	60.9973	8.67816	5.98473	5.69692	4.86682	100	100	100	100					M BoE-500 W0 vs W4			P=0.00146
	BoE-50	17	M		141.424	10.34	30.141	7.548	153.415	8.383	47.441	10.352	108.479	81.0735	157.397	137.149																	F HDF W0 vs W4			P=0.00031
		20			115.86	8.243	24.07	6.109	71.813	4.875	15.52	4.109	61.9826	59.1411	64.4786	67.2614																	F BoE-50 W0 vs W4			P=0.00236
		21			150.14	9.417	31.731	7.395	176.309	8.816	30.281	6.073	117.43	93.6179	95.4303	82.1231																	F BoE-500 W0 vs W4			P=7.284E-04
		22			140.44	9.64	28.151	7.445	109.974	6.739	32.691	7.983	78.3068	69.9066	116.127	107.226																	Stat signif. Wk0 to Wk4
		23			163.069	10.07	29.651	6.943	157.664	8.044	26.881	5.506	96.6855	79.8808	90.658	79.3029
		24			130.33	9.037	29.311	7.085	157.574	8.283	25.531	5.391	120.904	91.6565	87.1038	76.0903	97.2979	79.2128	101.866	91.5255	23.2196	13.0824	31.8429	26.0492	101.01	101.934	122.093	119.637					Control(W0toW4) vs BoE(W0toW4)
		25	F		135.91	9.483	29.631	7.474	72.523	4.596	18.06	4.576	53.361	48.4657	60.9497	61.2256																	Male
		26			154.1	12.987	53.751	13.629	76.587	4.755	17.61	4.424	49.6995	36.6135	32.7622	32.4602																	HDF vs BoE-50		P=0.8878
		27			144.44	10.925	31.181	8.552	69.816	5.017	19.31	5.481	48.3356	45.9222	61.9287	0																	HDF vs BoE-500		P=0.2499
		28			113.134	8.992	28.451	7.48	81.725	5.704	17.36	4.839	72.2373	63.4342	61.0172	0																	Female
		31			118.078	10.17	27.211	7.639	85.122	5.694	18.56	5.011	72.0896	55.9882	68.2077	0																	HDF vs BoE-50		P=0.9547
		32			86.955	6.923	22.58	6.165	67.411	4.69	16.35	4.522	77.524	67.7452	72.4092	0	62.2079	53.0282	59.5458	15.6143	13.1148	11.6137	13.9117	25.8434	99.724	99.4091	98.4633	25.5983					HDF vs BoE-500		P=0.5710
	BoE-500	33	M		131.279	9.181	26.651	6.641	114.786	7.077	20.95	5.193	87.4367	77.0831	78.6087	0
		35			144.801	9.437	35.911	8.668	123.025	6.531	21.38	4.55	84.9614	69.2063	59.5361	0
		36			148.605	11.067	29.951	8.09	129.938	7.84	23.76	5.792	87.4385	70.8412	79.3296	0
		37			197.702	13.784	62.381	15.127	143.545	8.057	24.68	5.569	72.6068	58.4518	39.5633	0
		38			175.87	12.189	32.701	8.51	150.923	8.215	24.21	5.286	85.8151	67.3968	74.0344	0
		40			147.428	10.495	33.881	8.22	92.185	5.971	18.75	4.907	62.5288	56.8938	55.3408	0	80.1312	66.6455	64.4021	0	10.2846	7.69289	15.7492	0	83.1885	85.7624	77.19	0
		41	F		128.748	10.707	32.731	9.631	78.472	5.201	17.38	4.609	60.9501	48.5757	53.0995	0
		42			108.595	8.318	22.83	6.446	79.401	5.203	17.78	4.682	73.1166	62.5511	77.88	0
		43			82.832	7.16	24.09	6.771	67.18	4.733	16.33	4.504	81.1039	66.1034	67.7875	0
		45			126.433	9.246	25.051	6.606	85.167	5.514	19.64	5.087	67.3614	59.6366	78.4001	0
		46			114.255	10.167	27.691	7.743	71.562	4.361	17.53	4.338	62.6336	42.8937	63.3058	0
		48			152.98	11.129	30.851	8.391	97.223	6.216	19.29	4.985	63.5528	55.8541	62.5263	0	68.1197	55.9357	67.1665	0	7.70055	8.77624	9.75371	0	109.201	104.86	111.065	0

## Sheet: CAT Wk0 vs Wk8
A					Week 0 (Body Fat)				Week 4 (Body Fat)				Change (Wk0 to Wk8)				Avrg Change (Wk0 to Wk8)				StDev (Wk0 to Wk8)				vs HFD				Stat signifcance Wk8				Stat signifcance Wk8
	Diet	No.	Sex		Volume（mm3）	Vol ratio（%）	Area（mW8）	Area ratio（%）	Volume（mm3）	Vol ratio（%）	Area（mW8）	Area ratio（%）	Volume（mm3）	Vol ratio（%）	Area（mW8）	Area ratio（%）	Volume（mm3）	Vol ratio（%）	Area（mW8）	Area ratio（%）	Volume（mm3）	Vol ratio（%）	Area（mW8）	Area ratio（%）	Volume（mm3）	Vol ratio（%）	Area（mW8）	Area ratio（%）	T-test (Control vs BoE)				T-test (Control vs BoE)
	HFD	1	M	Body Fat	256.584	19.417	84.592	21.398	753.202	34.572	190.554	35.071	293.55	178.05	225.262	163.898													Male				M HDF W0 vs W8			P=0.0108
		3			258.931	18.769	51.191	13.455	1166.19	47.217	287.686	46.378	450.385	251.569	561.986	344.69													HDF vs BoE-50		P=0.9439		M BoE-50 W0 vs W8			P=0.0143
		4			195.223	15.001	54.791	13.873	296.771	15.512	57.961	12.068	152.016	103.406	105.786	86.9891													HDF vs BoE-500		P=0.8635		M BoE-500 W0 vs W8			P=7.969E-05
		5			196.173	14.901	48.941	12.219	806.757	38.128	183.694	34.545	411.248	255.875	375.338	282.715													Female				F HDF W0 vs W8			P=0.8232
		6			211.988	13.618	40.001	9.941	903.344	37.033	222.864	36.571	426.13	271.942	557.146	367.88													HDF vs BoE-50		P=0.1846		F BoE-50 W0 vs W8			P=0.2964
		8			413.401	26.496	85.782	20.367	1151.87	45.654	276.396	43.68	278.633	172.305	322.207	214.465	335.327	205.525	357.954	243.44	114.726	65.3498	181.153	108.557	100	100	100	100	HDF vs BoE-500		P=0.2521		F BoE-500 W0 vs W8			P=0.5801
		9	F		174.909	13.641	44.391	12.013	300.725	17.882	66.251	16.104	171.932	131.09	149.244	134.055																	Stat signif. Wk0 to Wk8
		11			227.453	16.925	53.761	15.26	317.254	19.141	73.761	17.923	139.481	113.093	137.202	117.451
		12			207.256	18.634	60.551	16.955	229.496	14.649	46.281	11.85	110.731	78.6144	76.4331	69.8909																	Control(W0toM3) vs BoE(W0toM3)
		14			217.755	16.826	59.931	16.237	212.423	13.249	46.871	11.76	97.5514	78.7412	78.2083	72.4272																	Male
		15			196.593	16.111	59.421	15.862	480.692	25.944	107.912	23.58	244.511	161.033	181.606	148.657																	HDF vs BoE-50		P=0.9142
		16			238.656	19.854	62.731	17.371	235.514	14.093	45.611	11.052	98.6835	70.9832	72.7089	63.6233	143.815	105.592	115.9	101.017	56.9576	35.8514	46.3177	36.9206	100	100	100	100					HDF vs BoE-500		P=0.3111
	BoE-50	17	M		232.827	17.022	51.201	12.822	995.355	41.505	223.284	37.161	427.508	243.832	436.093	289.822																	Female
		20			184.653	13.137	34.451	8.743	256.187	13.45	46.461	10.221	138.74	102.383	134.861	116.905																	HDF vs BoE-50		P=0.2418
		21			271.673	17.04	65.201	15.196	706.367	31.505	176.394	31.41	260.006	184.888	270.539	206.699																	HDF vs BoE-500		P=0.00351
		22			253.609	17.409	55.831	14.766	926.631	40.027	246.035	42.541	365.378	229.921	440.678	288.101
		23			354.773	21.909	67.061	15.704	1139.2	45.23	269.775	42.883	321.106	206.445	402.283	0
		24			258.738	17.941	49.861	12.052	1071.19	43.35	272.045	44.128	414.005	241.625	545.607	0	321.124	201.516	371.677	150.255	108.538	53.5433	145.883	132.614	95.7644	98.0494	103.834	61.7215
		25	F		229.066	15.983	56.301	14.201	186.351	11.262	45.791	11.149	81.3525	70.4624	81.3325	0
		26			247.007	20.818	90.762	23.013	307.937	18.434	63.911	15.348	124.667	88.5484	70.416	0
		27			201.004	15.204	50.181	13.763	160.011	10.663	35.811	9.664	79.6059	70.1329	71.3637	0
		28			217.038	17.249	56.711	14.911	374.536	20.297	83.312	18.198	172.567	117.671	146.906	269.242
		31			183.474	15.802	47.631	13.372	149.405	10.055	32.141	8.769	81.4312	63.6312	67.4792	0
		32			140.329	11.173	39.781	10.861	156.128	9.941	31.761	8.063	111.259	88.9734	79.8396	0	108.48	83.2365	86.2229	44.8737	36.5463	19.8297	30.2295	109.918	75.4305	78.828	74.394	44.4218
	BoE-500	33	M		239.344	16.739	53.261	13.272	775.504	34.542	183.304	32.648	324.012	206.356	344.162	0
		35			271.315	17.682	70.911	17.116	734.846	32.529	204.544	36.119	270.846	183.967	288.452	0
		36			308.521	22.977	77.632	20.969	981.153	41.939	257.195	43.716	318.018	182.526	331.3	208.479
		37			404.14	28.178	130.933	31.751	946.963	41.357	228.835	39.952	234.316	146.771	174.773	125.829
		38			338.693	23.474	69.811	18.167	850.149	37.616	184.454	32.918	251.009	160.245	264.219	181.197
		40			297.142	21.152	76.582	18.581	776.497	35.399	180.474	32.904	261.322	167.355	235.661	177.084	276.587	174.537	273.094	115.432	36.5317	20.9381	62.9627	93.3177	82.4828	84.9225	76.2931	47.4169
		41	F		200.376	16.664	51.561	15.171	156.489	9.805	31.741	8.019	78.0977	58.8394	61.5601	52.8574
		42			172.54	13.216	37.001	10.447	130.518	8.159	29.211	7.377	75.6451	61.7358	78.9465	70.6136
		43			133.547	11.543	41.331	11.617	105.451	6.979	30.181	7.905	78.9617	60.4609	73.0227	68.0468
		45			200.191	14.64	45.631	12.033	218.362	12.795	45.851	10.847	109.077	87.3975	100.482	90.1438
		46			178.929	15.922	47.481	13.277	379.777	21.715	81.462	18.738	212.25	136.384	171.568	141.131
		48			250.308	18.21	57.441	15.623	358.057	20.894	79.592	18.963	143.047	114.739	138.563	121.379	116.18	86.5927	104.024	90.6953	53.815	32.6894	42.8037	34.157	80.7841	82.0065	89.7527	89.7819
B					Week 0 (Visceral Fat)				Week 4 (Visceral Fat)				Change (Wk0 to Wk8)				Avrg Change (Wk0 to Wk8)				StDev (Wk0 to Wk8)				vs HFD				Stat signifcance Wk8				Stat signifcance Wk8
	Diet	No.	Sex		Volume（mm3）	Vol ratio（%）	Area（mW8）	Area ratio（%）	Volume（mm3）	Vol ratio（%）	Area（mW8）	Area ratio（%）	Volume（mm3）	Vol ratio（%）	Area（mW8）	Area ratio（%）	Volume（mm3）	Vol ratio（%）	Area（mW8）	Area ratio（%）	Volume（mm3）	Vol ratio（%）	Area（mW8）	Area ratio（%）	Volume（mm3）	Vol ratio（%）	Area（mW8）	Area ratio（%）	T-test (Control vs BoE)				T-test (Control vs BoE)
	HFD	1	M	Visceral Fat	70.096	5.305	29.631	7.495	461.809	21.197	137.233	25.258	658.824	399.566	463.14	336.998													Male				M HDF W0 vs W8			P=0.0034
		3			122.978	8.914	21.98	5.777	806.098	32.637	224.854	36.249	655.481	366.132	1022.99	627.471													HDF vs BoE-50		P=0.6919		M BoE-50 W0 vs W8			P=0.0127
		4			79.211	6.087	21.95	5.558	205.028	10.717	38.881	8.095	258.838	176.064	177.134	145.646													HDF vs BoE-500		P=0.6035		M BoE-500 W0 vs W8			P=1.614E-05
		5			90.28	6.857	22.98	5.737	521.85	24.663	129.563	24.365	578.035	359.676	563.808	424.699													Female				F HDF W0 vs W8			P=0.4295
		6			110.171	7.077	16.2	4.026	725.636	29.748	190.814	31.312	658.645	420.348	1177.86	777.745													HDF vs BoE-50		P=0.3135		F BoE-50 W0 vs W8			P=0.9251
		8			219.749	14.084	49.081	11.653	817.74	32.411	220.934	34.915	372.125	230.126	450.142	299.622	530.325	325.319	642.514	435.364	173.003	98.7198	380.347	230.773	100	100	100	100	HDF vs BoE-500		P=0.2359		F BoE-500 W0 vs W8			P=0.8348
		9	F		75.209	5.866	20.27	5.486	126.004	7.492	35.971	8.744	167.538	127.719	177.459	159.388																	Stat signif. Wk0 to Wk8
		11			81.308	6.05	25.381	7.204	145.393	8.772	42.791	10.398	178.818	144.992	168.595	144.336
		12			87.268	7.846	30.311	8.487	94.162	6.01	21.42	5.484	107.9	76.5995	70.6674	64.6165																	Control(W0toM3) vs BoE(W0toM3)
		14			75.931	5.867	21.74	5.89	86.523	5.396	23.74	5.957	113.95	91.972	109.2	101.138																	Male
		15			76.823	6.296	28.281	7.549	227.586	12.283	61.461	13.43	296.247	195.092	217.323	177.904																	HDF vs BoE-50		P=0.5158
		16			104.401	8.685	31.431	8.703	107.093	6.409	20.87	5.057	102.579	73.7939	66.3994	58.1064	161.172	118.361	134.94	117.581	73.6183	47.1403	61.998	50.429	100	100	100	100					HDF vs BoE-500		P=0.0623
	BoE-50	17	M		91.403	6.683	21.06	5.274	668.122	27.86	165.523	27.548	730.963	416.879	785.959	522.336																	Female
		20			68.792	4.894	10.38	2.634	103.477	5.433	23.26	5.117	150.42	111.013	224.085	194.267																	HDF vs BoE-50		P=0.3447
		21			121.534	7.623	33.471	7.801	426.904	19.041	126.063	22.447	351.263	249.784	376.634	287.745																	HDF vs BoE-500		P=0.3819
		22			113.168	7.768	27.681	7.321	634.745	27.419	192.764	33.33	560.887	352.974	696.377	455.266
		23			191.704	11.839	37.411	8.761	760.365	30.189	200.644	31.894	396.635	254.996	536.324	364.045
		24			128.408	8.904	20.55	4.967	697.753	28.237	171.163	27.764	543.387	317.127	832.91	558.969	455.593	283.795	575.381	397.105	201.055	105.307	240.724	141.04	85.9083	87.2361	89.5516	91.2122
		25	F		93.156	6.5	26.671	6.727	81.054	4.898	24.28	5.912	87.0089	75.3538	91.0352	87.8846
		26			92.908	7.83	37.011	9.384	155.549	9.312	36.301	8.718	167.423	118.927	98.0817	92.9028
		27			56.564	4.278	19	5.211	63.503	4.232	15.81	4.267	112.268	98.9247	83.2105	81.8845
		28			103.903	8.258	28.261	7.43	184.807	10.015	48.531	10.6	177.865	121.276	171.724	142.665
		31			65.396	5.632	20.42	5.733	48.909	3.291	10.72	2.925	74.789	58.4339	52.4976	51.0204
		32			53.375	4.25	17.2	4.696	65.713	4.184	11.78	2.991	123.116	98.4471	68.4884	63.6925	123.745	95.2272	94.1729	86.675	41.7494	24.5478	41.3668	31.6149	76.7782	80.4546	69.7885	73.7148
	BoE-500	33	M		108.065	7.558	26.611	6.631	478.978	21.335	106.502	18.969	443.231	282.284	400.218	286.065
		35			126.514	8.245	35.001	8.448	487.687	21.588	162.913	28.767	385.481	261.831	465.452	340.518
		36			159.916	11.91	47.681	12.879	660.034	28.213	202.694	34.452	412.738	236.885	425.104	267.505
		37			206.438	14.393	68.551	16.623	540.98	23.626	155.053	27.071	262.054	164.149	226.186	162.853
		38			162.823	11.285	37.111	9.657	552.78	24.458	137.053	24.458	339.497	216.73	369.306	253.267
		40			149.713	10.657	42.701	10.36	443.235	20.207	119.672	21.819	296.056	189.612	280.256	210.608	356.51	225.249	361.087	253.469	69.8389	44.2772	90.9077	61.4582	67.2248	69.2394	56.1991	58.2202
		41	F		71.628	5.957	18.83	5.541	51.402	3.221	11.01	2.781	71.7624	54.0708	58.4705	50.1895
		42			63.945	4.898	14.17	4.001	40.233	2.515	9.43	2.382	62.9181	51.3475	66.549	59.5351
		43			50.715	4.384	17.24	4.846	26.292	1.74	11.93	3.125	51.8427	39.6898	69.1995	64.4862
		45			73.758	5.394	20.58	5.427	52.684	3.087	15.08	3.568	71.4282	57.2303	73.275	65.7453
		46			64.674	5.755	19.79	5.534	193.34	11.055	46.931	10.795	298.945	192.094	237.145	195.067
		48			97.328	7.081	26.591	7.232	164.893	9.622	45.111	10.748	169.42	135.885	169.648	148.617	121.053	88.3862	112.381	97.2734	97.0021	61.4863	73.8192	59.8496	75.1079	74.6748	83.282	82.7285
C					Week 0 (Subcutaneous Fat)				Week 4 (Subcutaneous Fat)				Change (Wk0 to Wk8)				Avrg Change (Wk0 to Wk8)				StDev (Wk0 to Wk8)				vs HFD				Stat signifcance Wk8				Stat signifcance Wk8
	Diet	No.	Sex		Volume（mm3）	Vol ratio（%）	Area（mW8）	Area ratio（%）	Volume（mm3）	Vol ratio（%）	Area（mW8）	Area ratio（%）	Volume（mm3）	Vol ratio（%）	Area（mW8）	Area ratio（%）	Volume（mm3）	Vol ratio（%）	Area（mW8）	Area ratio（%）	Volume（mm3）	Vol ratio（%）	Area（mW8）	Area ratio（%）	Volume（mm3）	Vol ratio（%）	Area（mW8）	Area ratio（%）	T-test (Control vs BoE)				T-test (Control vs BoE)
	HFD	1	M	Subcutaneous Fat	186.488	14.113	54.961	13.903	291.393	13.375	53.321	9.814	156.253	94.7708	97.0161	70.5891													Male				M HDF W0 vs W8			P=0.5939
		3			135.953	9.855	29.211	7.678	360.089	14.579	62.831	10.129	264.863	147.935	215.094	131.922													HDF vs BoE-50		P=0.4393		M BoE-50 W0 vs W8			P=0.0293
		4			116.011	8.914	32.841	8.315	91.743	4.795	19.08	3.973	79.0813	53.7918	58.0981	47.7811													HDF vs BoE-500		P=0.1890		M BoE-500 W0 vs W8			P=0.0348
		5			105.893	8.043	25.961	6.481	284.908	13.465	54.131	10.18	269.053	167.413	208.509	157.075													Female				F HDF W0 vs W8			P=0.6771
		6			101.817	6.54	23.8	5.915	177.708	7.285	32.051	5.259	174.537	111.391	134.668	88.9096													HDF vs BoE-50		P=0.0932		F BoE-50 W0 vs W8			P=0.0616
		8			193.653	12.412	36.701	8.714	334.132	13.243	55.461	8.765	172.542	106.695	151.116	100.585	186.055	113.666	144.083	99.477	71.7581	40.1467	61.5467	39.9751	100	100	100	100	HDF vs BoE-500		P=0.3111		F BoE-500 W0 vs W8			P=0.3460
		9	F		99.7	7.776	24.12	6.528	174.721	10.389	30.281	7.36	175.247	133.603	125.543	112.745																	Stat signif. Wk0 to Wk8
		11			146.144	10.875	28.381	8.056	171.86	10.369	30.971	7.526	117.596	95.3471	109.126	93.4211
		12			119.989	10.788	30.241	8.468	135.334	8.638	24.86	6.365	112.789	80.0704	82.2063	75.1653																	Control(W0toM3) vs BoE(W0toM3)
		14			141.823	10.959	38.191	10.347	125.901	7.853	23.13	5.804	88.7733	71.658	60.564	56.0936																	Male
		15			119.77	9.815	31.141	8.313	253.107	13.661	46.451	10.15	211.328	139.185	149.163	122.098																	HDF vs BoE-50		P=0.3213
		16			134.255	11.169	31.301	8.667	128.421	7.685	24.74	5.995	95.6545	68.8065	79.039	69.1704	133.565	98.1117	100.94	88.1156	48.815	31.1075	33.0413	25.8519	100	100	100	100					HDF vs BoE-500		P=0.4580
	BoE-50	17	M		141.424	10.34	30.141	7.548	327.233	13.645	57.761	9.613	231.384	131.963	191.636	127.358																	Female
		20			115.86	8.243	24.07	6.109	152.71	8.017	23.2	5.104	131.806	97.2583	96.3855	83.5489																	HDF vs BoE-50		P=0.2140
		21			150.14	9.417	31.731	7.395	279.463	12.465	50.331	8.962	186.135	132.367	158.618	121.19																	HDF vs BoE-500		P=0.4574
		22			140.44	9.64	28.151	7.445	291.886	12.608	53.271	9.211	207.837	130.788	189.233	123.721
		23			163.069	10.07	29.651	6.943	378.833	15.041	69.131	10.989	232.315	149.364	233.149	158.275
		24			130.33	9.037	29.311	7.085	373.434	15.113	100.882	16.364	286.53	167.235	344.178	230.967	212.668	134.829	202.2	140.843	51.8804	23.2533	83.0559	50.1399	114.304	118.619	140.335	141.584
		25	F		135.91	9.483	29.631	7.474	105.296	6.363	21.51	5.237	77.4748	67.099	72.5929	70.0696
		26			154.1	12.987	53.751	13.629	152.389	9.123	27.611	6.631	98.8897	70.2472	51.3683	48.6536
		27			144.44	10.925	31.181	8.552	96.508	6.431	20	5.397	66.8153	58.865	64.1416	63.108
		28			113.134	8.992	28.451	7.48	189.73	10.282	34.781	7.597	167.704	114.346	122.249	101.564
		31			118.078	10.17	27.211	7.639	100.496	6.763	21.42	5.844	85.1098	66.4995	78.7182	76.5022
		32			86.955	6.923	22.58	6.165	90.415	5.757	19.98	5.072	103.979	83.1576	88.4854	82.2709	99.9954	76.7024	79.5925	73.6947	35.8642	20.0743	24.4284	17.9467	74.8667	78.1786	78.8511	83.6342
	BoE-500	33	M		131.279	9.181	26.651	6.641	296.526	13.208	76.802	13.679	225.875	143.862	288.177	205.978
		35			144.801	9.437	35.911	8.668	247.159	10.941	41.631	7.351	170.689	115.937	115.928	84.8062
		36			148.605	11.067	29.951	8.09	321.12	13.726	54.501	9.264	216.09	124.026	181.967	114.512
		37			197.702	13.784	62.381	15.127	405.983	17.731	73.781	12.881	205.351	128.635	118.275	85.1524
		38			175.87	12.189	32.701	8.51	297.369	13.157	47.401	8.459	169.085	107.942	144.953	99.4007
		40			147.428	10.495	33.881	8.22	333.262	15.193	60.801	11.085	226.051	144.764	179.455	134.854	202.19	127.528	171.459	120.784	26.1602	14.801	63.894	45.8619	108.672	112.195	119	121.419
		41	F		128.748	10.707	32.731	9.631	105.087	6.584	20.73	5.237	81.6222	61.4925	63.3345	54.3765
		42			108.595	8.318	22.83	6.446	90.285	5.644	19.78	4.995	83.1392	67.8528	86.6404	77.4899
		43			82.832	7.16	24.09	6.771	79.159	5.239	18.25	4.78	95.5657	73.1704	75.7576	70.5952
		45			126.433	9.246	25.051	6.606	165.678	9.708	30.771	7.28	131.04	104.997	122.833	110.203
		46			114.255	10.167	27.691	7.743	186.438	10.66	34.531	7.943	163.177	104.849	124.701	102.583
		48			152.98	11.129	30.851	8.391	193.164	11.272	34.481	8.215	126.267	101.285	111.766	97.9025	113.469	85.6077	97.5055	85.525	32.2431	20.2159	25.8579	21.4982	84.9542	87.2554	96.5972	97.06

## Sheet: CAT Wk0 vs Wk11
A					Week 0 (Body Fat)				Week 4 (Body Fat)				Change (Wk0 to Wk11)				Avrg Change (Wk0 to Wk11)				StDev (Wk0 to Wk11)				vs HFD				Stat signifcance Wk11				Stat signifcance Wk11
	Diet	No.	Sex		Volume（mW11）	Vol ratio（%）	Area（mm2）	Area ratio（%）	Volume（mW11）	Vol ratio（%）	Area（mm2）	Area ratio（%）	Volume（mW11）	Vol ratio（%）	Area（mm2）	Area ratio（%）	Volume（mW11）	Vol ratio（%）	Area（mm2）	Area ratio（%）	Volume（mW11）	Vol ratio（%）	Area（mm2）	Area ratio（%）	Volume（mW11）	Vol ratio（%）	Area（mm2）	Area ratio（%）	T-test (Control vs BoE)				T-test (Control vs BoE)
	HFD	1	M	Body Fat	256.584	19.417	84.592	21.398	929.315	38.521	231.945	38.42	362.187	198.388	274.193	179.549													Male				M HDF W0 vs W11			P=1.512E-05
		3			258.931	18.769	51.191	13.455	1461.71	52.896	368.667	53.341	564.518	281.826	720.179	396.44													HDF vs BoE-50		P=0.7424		M BoE-50 W0 vs W11			P=0.0019
		4			195.223	15.001	54.791	13.873	899.32	37.51	224.684	37.409	460.663	250.05	410.075	269.653													HDF vs BoE-500		P=0.7365		M BoE-500 W0 vs W11			P=5.980E-05
		5			196.173	14.901	48.941	12.219	1018.38	43.717	252.355	43.368	519.121	293.383	515.631	354.923													Female				F HDF W0 vs W11			P=0.0105
		6			211.988	13.618	40.001	9.941	1146.62	43.968	280.976	43.069	540.891	322.867	702.422	433.246													HDF vs BoE-50		P=0.7897		F BoE-50 W0 vs W11			P=0.1153
		8			413.401	26.496	85.782	20.367	1452.31	52.744	356.717	51.603	351.308	199.064	415.841	253.366	466.448	257.596	506.39	314.53	91.7551	51.2184	176.415	96.3422	100	100	100	100	HDF vs BoE-500		P=0.1394		F BoE-500 W0 vs W11			P=0.2963
		9	F		174.909	13.641	44.391	12.013	718.477	34.749	172.153	33.32	410.772	254.739	387.811	277.366																	Stat signif. Wk0 to Wk11
		11			227.453	16.925	53.761	15.26	456.752	26.182	96.012	22.251	200.812	154.694	178.59	145.813
		12			207.256	18.634	60.551	16.955	314.972	19.164	66.051	16.208	151.972	102.844	109.083	95.5942																	Control(W0toW11) vs BoE(W0toW11)
		14			217.755	16.826	59.931	16.237	489.815	25.378	103.782	21.511	224.939	150.826	173.169	132.481																	Male
		15			196.593	16.111	59.421	15.862	892.592	39.362	213.734	37.706	454.03	244.318	359.694	237.713																	HDF vs BoE-50		P=0.6962
		16			238.656	19.854	62.731	17.371	739.991	36.941	141.733	28.34	310.066	186.063	225.938	163.145	292.098	182.247	239.048	175.352	120.919	58.6066	111.125	68.5807	100	100	100	100					HDF vs BoE-500		P=0.0610
	BoE-50	17	M		232.827	17.022	51.201	12.822	1191.67	47.781	299.236	47.967	511.827	280.701	584.434	374.099																	Female
		20			184.653	13.137	34.451	8.743	446.651	22.489	100.412	20.381	241.887	171.188	291.463	233.112																	HDF vs BoE-50		P=0.7634
		21			271.673	17.04	65.201	15.196	1249.9	48.426	310.256	48.047	460.074	284.19	475.845	316.182																	HDF vs BoE-500		P=0.2249
		22			253.609	17.409	55.831	14.766	1114.85	43.999	303.776	48.024	439.594	252.737	544.099	325.234
		23			354.773	21.909	67.061	15.704	1278.45	48.643	335.317	51.066	360.356	222.023	500.018	325.178
		24			258.738	17.941	49.861	12.052	1315.87	47.585	327.347	47.325	508.57	265.23	656.519	392.673	420.385	246.012	508.73	327.746	103.487	43.0106	124.246	55.6172	90.1246	95.5028	100.462	104.202
		25	F		229.066	15.983	56.301	14.201	730.508	36.338	164.653	32.883	318.907	227.354	292.451	231.554
		26			247.007	20.818	90.762	23.013	1147.56	48.407	282.936	48.047	464.584	232.525	311.734	208.782
		27			201.004	15.204	50.181	13.763	203.718	12.996	44.441	11.523	101.35	85.4775	88.5614	83.7245
		28			217.038	17.249	56.711	14.911	879.477	41.185	198.994	37.69	405.218	238.767	350.891	252.766
		31			183.474	15.802	47.631	13.372	261.429	15.435	50.971	12.204	142.488	97.6775	107.012	91.2653
		32			140.329	11.173	39.781	10.861	266.398	15.516	53.621	12.627	189.838	138.87	134.79	116.26	270.398	170.112	214.24	164.059	148.099	71.0934	116.534	75.448	92.5707	93.3412	89.6224	93.5596
	BoE-500	33	M		239.344	16.739	53.261	13.272	925.63	40.757	243.945	42.87	386.736	243.485	458.018	323.011
		35			271.315	17.682	70.911	17.116	858.77	34.257	223.124	35.569	316.521	193.739	314.654	207.811
		36			308.521	22.977	77.632	20.969	1402.93	53.495	369.867	56.286	454.727	232.82	476.436	0
		37			404.14	28.178	130.933	31.751	1164.78	48.343	279.496	46.352	288.212	171.563	213.465	0
		38			338.693	23.474	69.811	18.167	1014.33	42.312	241.605	40.717	299.483	180.25	346.084	0
		40			297.142	21.152	76.582	18.581	1021.66	41.818	256.055	41.869	343.831	197.702	334.354	0	348.252	203.26	357.169	88.4704	62.9724	28.8011	97.4649	141.816	74.6603	78.9064	70.5323	28.1278
		41	F		200.376	16.664	51.561	15.171	154.264	9.617	33.601	8.396	76.9873	57.7112	65.1675	0
		42			172.54	13.216	37.001	10.447	195.52	11.752	43.531	10.528	113.319	88.9225	117.648	359.023
		43			133.547	11.543	41.331	11.617	152.164	9.276	34.761	8.527	113.94	80.3604	84.1039	0
		45			200.191	14.64	45.631	12.033	534.019	28.794	113.482	24.595	266.755	196.68	248.695	0
		46			178.929	15.922	47.481	13.277	570.332	30.008	120.442	25.471	318.748	188.469	253.664	0
		48			250.308	18.21	57.441	15.623	688.192	34.979	142.853	29.145	274.938	192.087	248.695	0	194.114	134.038	169.662	59.8372	103.94	64.8057	89.9927	146.571	66.4551	73.5474	70.9742	34.124
B					Week 0 (Visceral Fat)				Week 4 (Visceral Fat)				Change (Wk0 to Wk11)				Avrg Change (Wk0 to Wk11)				StDev (Wk0 to Wk11)				vs HFD				Stat signifcance Wk11				Stat signifcance Wk11
	Diet	No.	Sex		Volume（mW11）	Vol ratio（%）	Area（mm2）	Area ratio（%）	Volume（mW11）	Vol ratio（%）	Area（mm2）	Area ratio（%）	Volume（mW11）	Vol ratio（%）	Area（mm2）	Area ratio（%）	Volume（mW11）	Vol ratio（%）	Area（mm2）	Area ratio（%）	Volume（mW11）	Vol ratio（%）	Area（mm2）	Area ratio（%）	Volume（mW11）	Vol ratio（%）	Area（mm2）	Area ratio（%）	T-test (Control vs BoE)				T-test (Control vs BoE)
	HFD	1	M	Visceral Fat	70.096	5.305	29.631	7.495	537.636	22.285	139.633	23.129	767	420.075	471.24	308.592													Male				M HDF W0 vs W11			P=7.243E-05
		3			122.978	8.914	21.98	5.777	964.582	34.906	277.516	40.153	784.353	391.586	1262.58	695.049													HDF vs BoE-50		P=0.7518		M BoE-50 W0 vs W11			P=0.002467
		4			79.211	6.087	21.95	5.558	559.109	23.32	165.553	27.564	705.848	383.112	754.228	495.934													HDF vs BoE-500		P=0.7719		M BoE-500 W0 vs W11			P=8.588E-06
		5			90.28	6.857	22.98	5.737	639.522	27.453	158.383	27.219	708.376	400.365	689.221	474.447													Female				F HDF W0 vs W11			P=0.01644
		6			110.171	7.077	16.2	4.026	846.478	32.458	223.144	34.205	768.331	458.641	1377.43	849.603													HDF vs BoE-50		P=0.9223		F BoE-50 W0 vs W11			P=0.07229
		8			219.749	14.084	49.081	11.653	626.75	27.274	196.764	34.124	285.212	193.652	400.896	292.834	669.853	374.572	825.934	519.41	191.298	92.6258	406.229	218.279	100	100	100	100	HDF vs BoE-500		P=0.2074		F BoE-500 W0 vs W11			P=0.15178
		9	F		75.209	5.866	20.27	5.486	395.703	19.138	110.602	21.407	526.138	326.253	545.644	390.211																	Stat signif. Wk0 to Wk11
		11			81.308	6.05	25.381	7.204	215.016	12.325	51.501	11.936	264.446	203.719	202.912	165.686
		12			87.268	7.846	30.311	8.487	126.3	7.684	31.131	7.639	144.727	97.9353	102.705	90.0082																	Control(W0toW11) vs BoE(W0toW11)
		14			75.931	5.867	21.74	5.89	241.657	12.521	59.041	12.238	318.259	213.414	271.578	207.776																	Male
		15			76.823	6.296	28.281	7.549	545.514	24.056	133.183	23.496	710.092	382.084	470.927	311.247																	HDF vs BoE-50		P=0.1601
		16			104.401	8.685	31.431	8.703	457.876	22.857	90.802	18.156	438.574	263.178	288.893	208.618	400.373	247.764	313.777	228.924	201.879	100.008	165.952	106.721	100	100	100	100					HDF vs BoE-500		P=0.00459
	BoE-50	17	M		91.403	6.683	21.06	5.274	779.939	30.01	224.904	34.443	853.297	449.05	1067.92	653.072																	Female
		20			68.792	4.894	10.38	2.634	223.98	11.277	62.661	12.719	325.59	230.425	603.671	482.878																	HDF vs BoE-50		P=0.8929
		21			121.534	7.623	33.471	7.801	739.2	28.64	214.924	33.284	608.225	375.705	642.12	426.663																	HDF vs BoE-500		P=0.3435
		22			113.168	7.768	27.681	7.321	745.243	29.412	237.235	37.504	658.528	378.63	857.032	512.28
		23			191.704	11.839	37.411	8.761	873.061	33.219	268.325	40.864	455.421	280.59	717.236	466.431
		24			128.408	8.904	20.55	4.967	762.564	27.576	226.245	32.708	593.86	309.704	1100.95	658.506	582.487	337.351	831.488	533.305	180.03	78.8303	214.465	98.8423	86.9574	90.063	100.672	102.675
		25	F		93.156	6.5	26.671	6.727	432.43	21.511	107.392	21.447	464.2	330.938	402.655	318.82
		26			92.908	7.83	37.011	9.384	676.21	28.525	190.414	32.335	727.828	364.304	514.479	344.576
		27			56.564	4.278	19	5.211	89.62	5.717	22.34	5.793	158.44	133.637	117.579	111.169
		28			103.903	8.258	28.261	7.43	544.881	25.516	135.933	25.746	524.413	308.985	480.991	346.514
		31			65.396	5.632	20.42	5.733	110.735	6.538	22.68	5.43	169.33	116.087	111.068	94.7148
		32			53.375	4.25	17.2	4.696	131.77	7.675	26.511	6.243	246.876	180.588	154.134	132.943	381.848	239.09	296.818	224.789	228.079	108.326	189.466	123.509	95.3731	96.4991	94.5952	98.1938
	BoE-500	33	M		108.065	7.558	26.611	6.631	622.662	27.417	189.554	33.312	576.192	362.755	712.314	502.368
		35			126.514	8.245	35.001	8.448	521.258	20.793	165.233	26.341	412.016	252.189	472.081	311.802
		36			159.916	11.91	47.681	12.879	846.275	32.269	265.375	40.384	529.2	270.94	556.563	313.565
		37			206.438	14.393	68.551	16.623	733.352	30.437	199.694	33.118	355.241	211.471	291.307	199.23
		38			162.823	11.285	37.111	9.657	623.637	26.015	169.243	28.522	383.015	230.527	456.045	295.351
		40			149.713	10.657	42.701	10.36	631.243	25.837	182.694	29.873	421.635	242.442	427.845	288.349	446.217	261.721	486.026	318.444	86.9767	53.3919	140.411	99.5458	66.6141	69.872	58.8457	61.3088
		41	F		71.628	5.957	18.83	5.541	70.262	4.38	14.97	3.741	98.0929	73.5269	79.5008	67.5149
		42			63.945	4.898	14.17	4.001	74.022	4.449	18.16	4.392	115.759	90.833	128.158	109.773
		43			50.715	4.384	17.24	4.846	56.362	3.436	14.89	3.653	111.135	78.3759	86.3689	75.3818
		45			73.758	5.394	20.58	5.427	288.804	15.572	69.291	15.017	391.556	288.691	336.691	276.709
		46			64.674	5.755	19.79	5.534	319.738	16.823	74.191	15.69	494.384	292.32	374.891	283.52
		48			97.328	7.081	26.591	7.232	389.375	19.791	85.162	17.375	400.065	279.494	320.266	240.252	268.499	183.874	220.979	175.525	179.225	113.007	136.885	102.087	67.0622	74.2132	70.4257	76.6738
C					Week 0 (Subcutaneous Fat)				Week 4 (Subcutaneous Fat)				Change (Wk0 to Wk11)				Avrg Change (Wk0 to Wk11)				StDev (Wk0 to Wk11)				vs HFD				Stat signifcance Wk0				Stat signifcance Wk11
	Diet	No.	Sex		Volume（mW11）	Vol ratio（%）	Area（mm2）	Area ratio（%）	Volume（mW11）	Vol ratio（%）	Area（mm2）	Area ratio（%）	Volume（mW11）	Vol ratio（%）	Area（mm2）	Area ratio（%）	Volume（mW11）	Vol ratio（%）	Area（mm2）	Area ratio（%）	Volume（mW11）	Vol ratio（%）	Area（mm2）	Area ratio（%）	Volume（mW11）	Vol ratio（%）	Area（mm2）	Area ratio（%）	T-test (Control vs BoE)				T-test (Control vs BoE)
	HFD	1	M	Subcutaneous Fat	186.488	14.113	54.961	13.903	391.679	16.235	92.312	15.291	210.029	115.036	167.959	109.983													Male				M HDF W0 vs W11			P=0.00736
		3			135.953	9.855	29.211	7.678	497.131	17.99	91.152	13.188	365.664	182.547	312.047	171.763													HDF vs BoE-50		P=0.8714		M BoE-50 W0 vs W11			P=0.00445
		4			116.011	8.914	32.841	8.315	340.211	14.19	59.131	9.845	293.258	159.188	180.052	118.4													HDF vs BoE-500		P=0.9801		M BoE-500 W0 vs W11			P=0.00398
		5			105.893	8.043	25.961	6.481	378.852	16.263	93.972	16.149	357.769	202.201	361.974	249.175													Female				F HDF W0 vs W11			P=0.00167
		6			101.817	6.54	23.8	5.915	300.146	11.509	57.831	8.865	294.79	175.979	242.987	149.873													HDF vs BoE-50		P=0.5327		F BoE-50 W0 vs W11			P=0.3122
		8			193.653	12.412	36.701	8.714	598.158	21.724	109.782	15.881	308.881	175.024	299.125	182.247	305.065	168.329	260.691	163.574	56.1093	29.5855	77.1855	50.6823	100	100	100	100	HDF vs BoE-500		P=0.0858		F BoE-500 W0 vs W11			P=0.7832
		9	F		99.7	7.776	24.12	6.528	322.774	15.611	61.551	11.913	323.745	200.759	255.187	182.491																	Stat signif. Wk0 to Wk11
		11			146.144	10.875	28.381	8.056	241.735	13.857	44.511	10.316	165.409	127.421	156.834	128.054
		12			119.989	10.788	30.241	8.468	188.673	11.479	34.921	8.569	157.242	106.405	115.476	101.193																	Control(W0toW11) vs BoE(W0toW11)
		14			141.823	10.959	38.191	10.347	248.157	12.858	44.741	9.273	174.977	117.328	117.151	89.6202																	Male
		15			119.77	9.815	31.141	8.313	347.077	15.306	80.552	14.211	289.786	155.945	258.669	170.949																	HDF vs BoE-50		P=0.7019
		16			134.255	11.169	31.301	8.667	282.115	14.083	50.931	10.184	210.134	126.09	162.714	117.503	220.215	138.991	177.671	131.635	70.2512	34.4503	64.4332	37.5138	100	100	100	100					HDF vs BoE-500		P=0.2636
	BoE-50	17	M		141.424	10.34	30.141	7.548	473.742	18.995	117.762	18.877	334.98	183.704	390.704	250.093																	Female
		20			115.86	8.243	24.07	6.109	222.672	11.211	37.751	7.662	192.191	136.006	156.838	125.422																	HDF vs BoE-50		P=0.5673
		21			150.14	9.417	31.731	7.395	510.696	19.787	95.332	14.763	340.147	210.12	300.438	199.635																	HDF vs BoE-500		P=0.1445
		22			140.44	9.64	28.151	7.445	369.607	14.587	66.541	10.519	263.178	151.317	236.372	141.289
		23			163.069	10.07	29.651	6.943	405.385	15.424	66.991	10.202	248.597	153.168	225.932	146.939
		24			130.33	9.037	29.311	7.085	553.302	20.009	101.102	14.616	424.539	221.412	344.929	206.295	300.605	175.955	275.869	178.279	82.4186	34.6866	85.7694	48.0468	98.5381	104.53	105.822	108.99
		25	F		135.91	9.483	29.631	7.474	298.078	14.828	57.261	11.436	219.32	156.364	193.247	153.01
		26			154.1	12.987	53.751	13.629	471.346	19.883	92.522	15.712	305.87	153.099	172.131	115.284
		27			144.44	10.925	31.181	8.552	114.098	7.279	22.1	5.73	78.9934	66.627	70.8765	67.0019
		28			113.134	8.992	28.451	7.48	334.596	15.669	63.061	11.944	295.752	174.255	221.648	159.679
		31			118.078	10.17	27.211	7.639	150.694	8.897	28.291	6.773	127.622	87.4828	103.969	88.6634
		32			86.955	6.923	22.58	6.165	134.628	7.841	27.111	6.384	154.825	113.26	120.066	103.552	197.064	125.181	146.99	114.532	92.3259	42.7829	57.8178	36.2444	89.4868	90.0641	82.7311	87.0071
	BoE-500	33	M		131.279	9.181	26.651	6.641	302.968	13.34	54.391	9.559	230.782	145.3	204.086	143.939
		35			144.801	9.437	35.911	8.668	337.512	13.463	57.891	9.229	233.087	142.662	161.207	106.472
		36			148.605	11.067	29.951	8.09	556.654	21.226	104.492	15.901	374.586	191.795	348.876	196.551
		37			197.702	13.784	62.381	15.127	431.426	17.906	79.802	13.234	218.22	129.904	127.927	87.486
		38			175.87	12.189	32.701	8.51	390.693	16.297	72.361	12.195	222.149	133.703	221.281	143.302
		40			147.428	10.495	33.881	8.22	390.422	15.98	73.361	11.996	264.822	152.263	216.525	145.937	257.274	149.271	213.317	137.281	59.7746	22.3346	75.5543	37.6755	84.3343	88.6782	81.8276	83.9262
		41	F		128.748	10.707	32.731	9.631	84.002	5.237	18.63	4.655	65.2453	48.9119	56.9185	48.3335
		42			108.595	8.318	22.83	6.446	121.498	7.303	25.371	6.136	111.882	87.7975	111.13	95.1908
		43			82.832	7.16	24.09	6.771	95.802	5.84	19.87	4.874	115.658	81.5642	82.4824	71.9835
		45			126.433	9.246	25.051	6.606	245.215	13.222	44.191	9.577	193.949	143.002	176.404	144.974
		46			114.255	10.167	27.691	7.743	250.595	13.185	46.251	9.781	219.33	129.684	167.025	126.321
		48			152.98	11.129	30.851	8.391	298.817	15.188	57.691	11.77	195.331	136.472	186.999	140.269	150.232	104.572	130.16	104.512	61.0055	37.5071	54.2731	39.2235	68.2206	75.2364	73.2587	79.3953
