# Supplementary material for: Antiobesity and Anti-Inflammatory Effects of Orally Administered Bonito Extracts on Mice Fed a High-Fat Diet
Source: Evid Based Complement Alternat Med. 2017 Oct 24;2017:9187167. doi: 10.1155/2017/9187167 (PMC5674501; doi:10.1155/2017/9187167)
Supplement: Supplementary file 1 — Table 1: Composition and estimated calories of BoE. Table 2: Body weights of six high fat diet feeding mice groups supplemented with or without BoE. Table 3: CT-scan quantitation of A, total; B, visceral and C, subcutaneous fat amount between the fourth and the fifth lumbar vertebra region. Table 4: Quantitation of six biomarkers related with liver and heart functions and obesity. Table 5: Multiplex quantitation of inflammation related cytokine, chemokine and growth factors secreted in sera. [file 9187167.f1.zip › Suppl Tab.4(BoE)170829.xlsx]

## Sheet: Sheet1
	Supplemental Table 4. Quantitation of six biomarkers related with liver and heart functions and obesity
A	Individual data																B	Average values, standard deviation and p-values
	Fuji DryChem System																	Subject	Group	Average	StdDev	vs HFD	M vs F
	FDC4000 V1.3-P02																					p-value	p-value
	Machine :40110019																	AST	HFD:M	101.167	45.1859		P=0.9530
		Lot.		404906	Average	415906	Average	497405	Average	202705	Average	202602	Average	302503	Average	Hemolysis			BoE-50:M	108.167	38.9739	P=0.7910	P=0.1106
		Subject		AST-PS		ALT-PS		CPK-PS		TCHO-PS		TG-PS		LDH-PS					BoE-500:M	103.667	44.1935	P=0.9283	P=0.4092
		Range		10-1000	StdDev	10-1000	StdDev	10-2000	StdDev	50-450	StdDev	10-500	StdDev	50-900	StdDev				HFD:F	102.667	35.2742
	Diet	Mouse #	Sex	U/L		U/L		U/L		mg/dL		mg/dL		U/L					BoE-50:F	74.8333	18.798	P=0.1437
	HFD	1	M	53	101.167	9	30.8333	86	548.167	77	169.333	109	94.3333	248	413.167				BoE-500:F	82.6667	34.9724	P=0.3694
		3		51		27		121		189		71		310				ALT	HFD:M	30.8333	16.2409		P=0.2757
		4		157		56		601		195		88		517		+			BoE-50:M	29.8333	12.8595	P=0.9134	P=0.4884
		5		125	45.1859	39	16.2409	681	516.187	161	49.4557	93	15.2009	480	137.006	±			BoE-500:M	22.5	4.54973	P=0.2803	P=0.7455
		6		138		34		1478		220		113		596		+			HFD:F	22.5	3.83406
		8		83		20		322		174		92		328		±			BoE-50:F	24.6667	10.5388	P=0.6528
		9	F	139	102.667	29	22.5	571	369.667	98	109	43	54.5	347	298				BoE-500:F	21	9.81835	P=0.7393
		11		155		23		673		113		65		338				LDH	HFD:M	413.167	137.006		P=0.0995
		12		73		20		243		107		61		250					BoE-50:M	473	189.662	P=0.5580	P=0.0527
		14		79	35.2742	24	3.83406	192	200.76	102	8.19756	62	11.5542	283	47.1169				BoE-500:M	378.167	83.0311	P=0.6280	P=0.4564
		15		92		21		295		114		59		239					HFD:F	298	47.1169
		16		78		18		244		120		37		331		±			BoE-50:F	273.5	72.1935	P=0.5142
	BoE-50	17	M	131	108.167	28	29.8333	564	408.333	170	155.5	128	106.5	510	473	+			BoE-500:F	460.667	239.926	P=0.1641
		20		62		34		173		172		99		815		+		CPK	HFD:M	548.167	516.187		P=0.4599
		21		127		47		384		169		104		383					BoE-50:M	408.333	222.123	P=0.5645	P=0.0715
		22		55	38.9739	8	12.8595	122	222.123	65	44.7158	135	20.734	247	189.662				BoE-500:M	401.833	299.191	P=0.5876	P=0.6351
		23		144		27		668		172		89		455		±			HFD:F	369.667	200.76
		24		130		35		539		185		84		428					BoE-50:F	190.167	105.171	P=0.1014
		25	F	59	74.8333	17	24.6667	111	190.167	130	109.167	60	64.3333	165	273.5				BoE-500:F	325	201.21	P=0.7212
		26		58		20		115		118		83		203				TCHO	HFD:M	169.333	49.4557		P=0.0320
		27		109		22		371		106		40		329					BoE-50:M	155.5	44.7158	P=0.6399	P=0.0582
		28		68	18.798	44	10.5388	169	105.171	103	12.4003	57	15.7184	297	72.1935	+			BoE-500:M	128.5	43.8714	P=0.1819	P=0.4216
		31		76		16		259		100		67		305		±			HFD:F	109	8.19756
		32		79		29		116		98		79		342					BoE-50:F	109.167	12.4003	P=0.9793
	BoE-500	33	M	70	103.667	23	22.5	245	401.833	151	128.5	142	108.5	365	378.167	±			BoE-500:F	108.833	31.5368	P=0.9905
		35		168		16		831		75		116		470				TG	HFD:M	94.3333	15.2009		P=7.08E-04
		36		103		19		216		86		100		362					BoE-50:M	106.5	20.734	P=0.2886	P=0.0039
		37		61	44.1935	29	4.54973	125	299.191	175	43.8714	107	29.4126	312	83.0311	±			BoE-500:M	108.5	29.4126	P=0.3288	P=0.0080
		38		74		23		263		111		57		277					HFD:F	54.5	11.5542
		40		146		25		731		173		129		483		+			BoE-50:F	64.3333	15.7184	P=0.2602
		41	F	43	82.6667	9	21	222	325	77	108.833	50	58	190	460.667				BoE-500:F	58	19.0788	P=0.7159
		42		63		15		158		72		53		698		+
		43		67		38		183		156		94		782		+
		45		143	34.9724	24	9.81835	692	201.21	104	31.5368	47	19.0788	440	239.926
		46		99		19		411		120		63		424
		48		81		21		284		124		41		230
