# Supplementary material for: Antiobesity and Anti-Inflammatory Effects of Orally Administered Bonito Extracts on Mice Fed a High-Fat Diet
Source: Evid Based Complement Alternat Med. 2017 Oct 24;2017:9187167. doi: 10.1155/2017/9187167 (PMC5674501; doi:10.1155/2017/9187167)
Supplement: Supplementary file 1 — Table 1: Composition and estimated calories of BoE. Table 2: Body weights of six high fat diet feeding mice groups supplemented with or without BoE. Table 3: CT-scan quantitation of A, total; B, visceral and C, subcutaneous fat amount between the fourth and the fifth lumbar vertebra region. Table 4: Quantitation of six biomarkers related with liver and heart functions and obesity. Table 5: Multiplex quantitation of inflammation related cytokine, chemokine and growth factors secreted in sera. [file 9187167.f1.zip › Suppl Tab.5(BoE)170829.xlsx]

## Sheet: Sheet1
		Supplement Table 5. Multiplex quantitation of inflammation related cytokine, chemokine and growth factors secreted in sera.
		IL-1α		Avrg Valu	Reltv Valu	Stdev	p-Val (Start vs End)		p-Val (HFD vs BoE)			IL-6		Avrg Valu	Reltv Valu	Stdev	p-Val (Start vs End)		p-Val (HFD vs BoE)			IL-17		Avrg Valu	Reltv Valu	Stdev	p-Val (Start vs End)		p-Val (HFD vs BoE)			MCP-1		Avrg Valu	Reltv Valu	Stdev	p-Val (Start vs End)		p-Val (HFD vs BoE)
		M	HFD-Start	53.6	1	10	P=0.1917					M	HFD-Start	20.8	1	5.4	P=0.0247					M	HFD-Start	305	1	59.3	P=0.0429					M	HFD-Start	580.5	1	69.1	P=0.0065
			HFD-End	64.9	1.21082	15							HFD-End	39.6	1.90385	9.4							HFD-End	460.1	1.50852	170.8							HFD-End	1071.8	1.84634	219.7
			BoE50-Start	49.4	1	5.8	P=0.0526		P=0.8843				BoE50-Start	22.9	1	2.4	P=0.0789		P=0.1891				BoE50-Start	345.7	1	66.3	P=0.1035		P=0.6649				BoE50-Start	619.4	1	41.2	P=0.0530		P=0.2169
			BoE50-End	61	1.23482	13.7							BoE50-End	33.4	1.45852	11.9							BoE50-End	470.7	1.36159	182							BoE50-End	918.7	1.48321	285.9
			BoE500-Start	51.4	1	6.4	P=0.8490		P=0.3529				BoE500-Start	21.6	1	3.2	P=0.1137		P=0.3341				BoE500-Start	392.9	1	50.9	P=0.2576		P=0.6799				BoE500-Start	616.2	1	67.2	P=0.0480		P=0.3224
			BoE500-End	52.4	1.01946	17							BoE500-End	33.5	1.55093	14.5							BoE500-End	506.7	1.28964	215.8							BoE500-End	946.3	1.5357	278.6
		F	HFD-Start	62.4	1	11.1	P=0.0054					F	HFD-Start	26.1	1	4.8	P=0.0010					F	HFD-Start	355.7	1	51.4	P=8.24E-04					F	HFD-Start	699.2	1	94.3	P=5.40E-04
			HFD-End	83.8	1.34295	19.5							HFD-End	49	1.87739	6.9							HFD-End	483.3	1.35873	60.6							HFD-End	1204.7	1.72297	169.5
			BoE50-Start	75.5	1	20.1	P=0.6942		P=0.2649				BoE50-Start	25.3	1	8.4	P=0.0174		P=0.5091				BoE50-Start	347.2	1	93.2	P=0.1079		P=0.6288				BoE50-Start	671.5	1	133.8	P=0.0128		P=0.7210
			BoE50-End	74.2	0.982781	13.8							BoE50-End	49	1.93676	5.4							BoE50-End	439.1	1.26469	124.6							BoE50-End	1068.1	1.59062	58
			BoE500-Start	64.8	1	10.9	P=0.7912		P=0.0650				BoE500-Start	25.6	1	4	P=0.2237		P=0.0120				BoE500-Start	425.7	1	86	P=0.2838		P=0.8331				BoE500-Start	675.2	1	51.5	P=0.1352		P=0.0716
			BoE500-End	63.7	0.983025	35.2							BoE500-End	30.8	1.20312	9.3							BoE500-End	539.6	1.26756	155.7							BoE500-End	894.3	1.3245	272.4
		IL-1β		Avrg Valu	Reltv Valu	Stdev	p-Val (Start vs End)		p-Val (HFD vs BoE)			IL-9		Avrg Valu	Reltv Valu	Stdev	p-Val (Start vs End)		p-Val (HFD vs BoE)			Eotaxin		Avrg Valu	Reltv Valu	Stdev	p-Val (Start vs End)		p-Val (HFD vs BoE)			MIP-1α		Avrg Valu	Reltv Valu	Stdev	p-Val (Start vs End)		p-Val (HFD vs BoE)
		M	HFD-Start	504.3	1	111.3	P=0.0885					M	HFD-Start	877.1	1	151.2	P=0.6728					M	HFD-Start	1086.5	1	158.2	P=0.0211					M	HFD-Start	91.4	1	20.3	P=0.0720
			HFD-End	641.7	1.27246	177.8							HFD-End	834.4	0.951317	349.3							HFD-End	1629.6	1.49986	255							HFD-End	116	1.26915	22
			BoE50-Start	550	1	120.8	P=0.4652		P=0.4444				BoE50-Start	979.5	1	72.3	P=0.7328		P=0.9133				BoE50-Start	1212	1	144.1	P=0.0422		P=0.1330				BoE50-Start	86.5	1	13.9	P=0.1320		P=0.9682
			BoE50-End	618.9	1.12527	239.7							BoE50-End	933.4	0.952935	294.2							BoE50-End	1470	1.21287	259.2							BoE50-End	112.1	1.29595	34.5
			BoE500-Start	569.6	1	90.2	P=0.4957		P=0.4596				BoE500-Start	921.6	1	125.1	P=0.0686		P=0.2415				BoE500-Start	1135.8	1	108.7	P=0.1619		P=0.4176				BoE500-Start	93	1	14.4	P=0.4862		P=0.6530
			BoE500-End	642.4	1.12781	230.2							BoE500-End	1044.8	1.13368	123.8							BoE500-End	1499.4	1.32013	546.3							BoE500-End	110.8	1.1914	51.9
		F	HFD-Start	522.1	1	133.7	P=0.0516					F	HFD-Start	882.1	1	157.8	P=0.0804					F	HFD-Start	1147	1	91.2	P=0.0070					F	HFD-Start	91.1	1	8.6	P=0.0103
			HFD-End	854.6	1.63685	193.2							HFD-End	1137.3	1.28931	157							HFD-End	1715.9	1.49599	367.8							HFD-End	130.7	1.43469	17.2
			BoE50-Start	555.2	1	74.7	P=0.0116		P=0.3040				BoE50-Start	969.4	1	249.1	P=0.8896		P=0.2976				BoE50-Start	1216.1	1	226.3	P=0.0421		P=0.4185				BoE50-Start	89.5	1	14	P=0.0171		P=0.8410
			BoE50-End	767.4	1.3822	99.3							BoE50-End	784.2	0.808954	438.6							BoE50-End	1580.2	1.2994	153.8							BoE50-End	129.6	1.44804	17.9
			BoE500-Start	527.7	1	123	P=0.0615		P=0.3480				BoE500-Start	888.2	1	168.4	P=0.2997		P=0.3949				BoE500-Start	1153.3	1	117.9	P=0.1128		P=0.1716				BoE500-Start	94.3	1	7.9	P=0.1117		P=0.6010
			BoE500-End	715.4	1.35569	184.5							BoE500-End	956.3	1.07667	76.7							BoE500-End	1432.1	1.24174	405.2							BoE500-End	127.9	1.35631	32.3
		IL-2		Avrg Valu	Reltv Valu	Stdev	p-Val (Start vs End)		p-Val (HFD vs BoE)			IL-10		Avrg Valu	Reltv Valu	Stdev	p-Val (Start vs End)		p-Val (HFD vs BoE)			G-CSF		Avrg Valu	Reltv Valu	Stdev	p-Val (Start vs End)		p-Val (HFD vs BoE)			MIP-1β		Avrg Valu	Reltv Valu	Stdev	p-Val (Start vs End)		p-Val (HFD vs BoE)
		M	HFD-Start	85.9	1	13.1	P=0.0404					M	HFD-Start	132.4	1	46	P=0.2440					M	HFD-Start	71.9	1	17	P=0.0140					M	HFD-Start	118.9	1	29.9	P=0.0095
			HFD-End	182.1	2.11991	68.4							HFD-End	163	1.23112	44.2							HFD-End	218.3	3.03616	81.4							HFD-End	323.5	2.72077	101.9
			BoE50-Start	98.2	1	12.7	P=0.0542		P=0.6990				BoE50-Start	108.3	1	17	P=0.5235		P=0.4604				BoE50-Start	78.7	1	13.2	P=0.0026		P=0.1868				BoE50-Start	122.7	1	17.4	P=0.0825		P=0.1654
			BoE50-End	197.5	2.0112	98.8							BoE50-End	125.6	1.15974	58.2							BoE50-End	177.7	2.25794	64.9							BoE50-End	228.7	1.8639	113.1
			BoE500-Start	82.9	1	14.3	P=0.0356		P=0.9643				BoE500-Start	133.2	1	45.2	P=0.2803		P=0.8352				BoE500-Start	81.7	1	11	P=0.0540		P=0.1789				BoE500-Start	122.3	1	19.3	P=0.0268		P=0.3770
			BoE500-End	178.7	2.15561	76.6							BoE500-End	176.4	1.32432	84.6							BoE500-End	164.7	2.01591	72.8							BoE500-End	269.9	2.20687	103
		F	HFD-Start	120.7	1	38.4	P=2.42E-04					F	HFD-Start	125.2	1	40.5	P=0.1041					F	HFD-Start	103.6	1	25.1	P=4.82E-04					F	HFD-Start	143.6	1	25.8	P=9.33E-04
			HFD-End	252.8	2.09445	74.2							HFD-End	189	1.50958	81							HFD-End	221.6	2.139	42.2							HFD-End	342.1	2.38231	63.8
			BoE50-Start	104.4	1	38.3	P=0.0713		P=0.4414				BoE50-Start	148.6	1	57.3	P=0.3574		P=0.3217				BoE50-Start	117.4	1	24.2	P=0.0023		P=0.0250				BoE50-Start	147	1	45.2	P=0.0296		P=0.9847
			BoE50-End	234.2	2.2433	76.1							BoE50-End	172.6	1.16151	75							BoE50-End	189.8	1.6167	18.9							BoE50-End	313.1	2.12993	42.4
			BoE500-Start	97.1	1	35.1	P=0.0127		P=0.8241				BoE500-Start	190.5	1	58.9	P=0.4773		P=0.3790				BoE500-Start	106.1	1	19	P=0.1256		P=0.0561				BoE500-Start	136.4	1	17.7	P=0.0233		P=0.1076
			BoE500-End	183	1.88465	64.9							BoE500-End	221.8	1.1643	129.8							BoE500-End	162.8	1.5344	49.3							BoE500-End	252.5	1.85117	96.1
		IL-3		Avrg Valu	Reltv Valu	Stdev	p-Val (Start vs End)		p-Val (HFD vs BoE)			IL-12(p40)		Avrg Valu	Reltv Valu	Stdev	p-Val (Start vs End)		p-Val (HFD vs BoE)			GM-CSF		Avrg Valu	Reltv Valu	Stdev	p-Val (Start vs End)		p-Val (HFD vs BoE)			RANTES		Avrg Valu	Reltv Valu	Stdev	p-Val (Start vs End)		p-Val (HFD vs BoE)
		M	HFD-Start	21	1	4.4	P=0.0116					M	HFD-Start	247.5	1	35.6	P=0.0043					M	HFD-Start	697.1	1	122.6	P=0.0158					M	HFD-Start	48.5	1	3.9	P=0.0358
			HFD-End	66.5	3.16667	25.1							HFD-End	407.5	1.64646	37.6							HFD-End	936.6	1.34357	105.2							HFD-End	59.8	1.233	11.8
			BoE50-Start	23.5	1	4.8	P=0.0289		P=0.0722				BoE50-Start	310.1	1	25	P=0.0060		P=0.0931				BoE50-Start	726.6	1	61	P=0.1727		P=0.2349				BoE50-Start	55.6	1	6	P=0.7553		P=0.1556
			BoE50-End	44.5	1.89362	19.9							BoE50-End	421.6	1.35956	57.5							BoE50-End	847.2	1.16598	187.3							BoE50-End	57.3	1.029	13.8
			BoE500-Start	20.7	1	3.5	P=0.0202		P=0.3648				BoE500-Start	248.2	1	28.4	P=0.2143		P=0.1697				BoE500-Start	725.5	1	72.3	P=0.3690		P=0.3166				BoE500-Start	48.1	1	6	P=0.3904		P=0.8862
			BoE500-End	51.5	2.48792	21.8							BoE500-End	313.5	1.26309	115.4							BoE500-End	843.5	1.16265	281.7							BoE500-End	59.3	1.233	28.6
		F	HFD-Start	27.2	1	16.1	P=0.0014					F	HFD-Start	252.2	1	33.2	P=0.0027					F	HFD-Start	728.7	1	35.2	P=0.0023					F	HFD-Start	47.2	1	5.9	P=0.0209
			HFD-End	75.4	2.77206	17.7							HFD-End	354.8	1.40682	56.1							HFD-End	1000.8	1.3734	132.7							HFD-End	61	1.291	8.6
			BoE50-Start	23.3	1	11.2	P=0.0300		P=0.8942				BoE50-Start	337.9	1	69.9	P=0.1902		P=0.2093				BoE50-Start	781.1	1	139.1	P=0.0088		P=0.9413				BoE50-Start	49.2	1	11.6	P=0.2429		P=0.6519
			BoE50-End	59.4	2.54936	11.8							BoE50-End	399.3	1.18171	118.5							BoE50-End	1044.5	1.33722	112.1							BoE50-End	56.7	1.152	9.6
			BoE500-Start	25.2	1	2.5	P=0.1593		P=0.3140				BoE500-Start	270.2	1	30.5	P=0.0054		P=0.3009				BoE500-Start	802.2	1	43.9	P=0.3038		P=0.1662				BoE500-Start	47.2	1	10.1	P=0.5460		P=0.4764
			BoE500-End	59.7	2.36905	45							BoE500-End	348.8	1.2909	15.2							BoE500-End	939.6	1.17128	249.2							BoE500-End	51.2	1.084	15.7
		IL-4		Avrg Valu	Reltv Valu	Stdev	p-Val (Start vs End)		p-Val (HFD vs BoE)			IL-12(p70)		Avrg Valu	Reltv Valu	Stdev	p-Val (Start vs End)		p-Val (HFD vs BoE)			IFN-γ		Avrg Valu	Reltv Valu	Stdev	p-Val (Start vs End)		p-Val (HFD vs BoE)			TNFα		Avrg Valu	Reltv Valu	Stdev	p-Val (Start vs End)		p-Val (HFD vs BoE)
		M	HFD-Start	15	1	4.8	P=0.0356					M	HFD-Start	717.1	1	113.8	P=0.1271					M	HFD-Start	105	1	15.9	P=0.0196					M	HFD-Start	1156.7	1	181.7	P=0.0066
			HFD-End	34.5	2.3	11.9							HFD-End	969.8	1.35239	288.1							HFD-End	162.8	1.55048	32.8							HFD-End	2235.1	1.93231	556.9
			BoE50-Start	16.8	1	3.6	P=0.1119		P=0.3056				BoE50-Start	799.1	1	177.6	P=0.2359		P=0.4479				BoE50-Start	105.9	1	15.8	P=0.0997		P=0.3085				BoE50-Start	1097.8	1	116.4	P=0.0543		P=0.5443
			BoE50-End	30.5	1.81548	17.8							BoE50-End	959.8	1.2011	358.2							BoE50-End	140.7	1.32861	45.9							BoE50-End	1904.5	1.73483	803.4
			BoE500-Start	14	1	5.1	P=0.0632		P=0.7499				BoE500-Start	707.7	1	73.4	P=0.2901		P=0.7536				BoE500-Start	114.3	1	14.2	P=0.1773		P=0.5274				BoE500-Start	1171.6	1	147.1	P=0.0423		P=0.6955
			BoE500-End	28.2	2.01429	11.8							BoE500-End	921.7	1.30239	435							BoE500-End	154.5	1.35171	59.2							BoE500-End	2118.6	1.8083	810.5
		F	HFD-Start	26.4	1	20	P=0.0180					F	HFD-Start	752.2	1	149.3	P=0.0074					F	HFD-Start	108.3	1	14	P=0.0067					F	HFD-Start	1231.3	1	184.5	P=5.19E-04
			HFD-End	44.8	1.69697	6.3							HFD-End	1127.3	1.49867	161.7							HFD-End	160.8	1.48476	28.1							HFD-End	2366.2	1.92171	325.2
			BoE50-Start	20.9	1	4.9	P=0.0372		P=0.7025				BoE50-Start	797.1	1	165	P=0.0816		P=0.313				BoE50-Start	107.3	1	25.5	P=0.0411		P=0.6093				BoE50-Start	1277	1	291.9	P=0.0143		P=0.9968
			BoE50-End	37.5	1.79426	5.5							BoE50-End	1012.1	1.26973	143							BoE50-End	163.8	1.52656	23.3							BoE50-End	2333.3	1.82717	219.3
			BoE500-Start	17.6	1	2.2	P=0.0975		P=0.5567				BoE500-Start	843.8	1	114.7	P=0.4128		P=0.7807				BoE500-Start	115	1	11.8	P=0.0305		P=0.8136				BoE500-Start	1275.4	1	91.1	P=0.0302		P=0.1632
			BoE500-End	31.8	1.80682	15							BoE500-End	1184.2	1.40341	817.4							BoE500-End	167.7	1.45826	43.7							BoE500-End	2048.3	1.60601	571.3
		IL-5		Avrg Valu	Reltv Valu	Stdev	p-Val (Start vs End)		p-Val (HFD vs BoE)			IL-13		Avrg Valu	Reltv Valu	Stdev	p-Val (Start vs End)		p-Val (HFD vs BoE)			KC		Avrg Valu	Reltv Valu	Stdev	p-Val (Start vs End)		p-Val (HFD vs BoE)
		M	HFD-Start	51.2	1	13.4	P=0.0421					M	HFD-Start	724.3	1	198.4	P=0.0429					M	HFD-Start	55.7	1	8.9	P=0.0071
			HFD-End	95	1.85547	31.7							HFD-End	1248.3	1.72346	467.6							HFD-End	106.5	1.91203	19.6
			BoE50-Start	53.8	1	4.7	P=0.3271		P=0.1876				BoE50-Start	790.6	1	139.7	P=0.2284		P=0.2425				BoE50-Start	65.5	1	12.7	P=0.0313		P=0.1525
			BoE50-End	71.2	1.32342	38							BoE50-End	1053.4	1.33241	493.4							BoE50-End	95.5	1.45802	23
			BoE500-Start	50	1	13.4	P=0.2002		P=0.3109				BoE500-Start	752.8	1	63.2	P=0.1103		P=0.4582				BoE500-Start	63.2	1	12.2	P=0.0675		P=0.4053
			BoE500-End	66.9	1.338	28.4							BoE500-End	1099.6	1.46068	420							BoE500-End	98.8	1.56329	33.9
		F	HFD-Start	69.5	1	14.5	P=0.0010					F	HFD-Start	889.7	1	237.4	P=0.0037					F	HFD-Start	57.1	1	12.3	P=0.0512
			HFD-End	134.6	1.93669	10.2							HFD-End	1852.5	2.08216	315.1							HFD-End	84.6	1.48161	22.8
			BoE50-Start	62.3	1	14.3	P=0.0014		P=0.6964				BoE50-Start	950.6	1	266.1	P=0.0107		P=0.6692				BoE50-Start	62.8	1	20.8	P=0.0056		P=0.9436
			BoE50-End	115	1.84591	10.7							BoE50-End	1786.2	1.87902	210							BoE50-End	93.3	1.48567	22.8
			BoE500-Start	65.1	1	9.5	P=0.3074		P=0.0118				BoE500-Start	977.9	1	168.6	P=0.1396		P=0.0243				BoE500-Start	64	1	9.2	P=0.0614		P=0.2047
			BoE500-End	78.4	1.2043	24.4							BoE500-End	1275.9	1.30473	462.6							BoE500-End	78	1.21875	21.4
